# Supplementary material
Source: MDPI journal article supplement (https://www.mdpi.com/2624-5175/5/4/45)
Supplement: s1 [file s1]

**Table S1. Pearson correlation coefficients between rest-activity rhythm parameters, NHANES 2011 – 2014**

|                               | <b>F Statistic</b> | <b>Amplitude</b> | <b>Mesor</b> | <b>Amplitude:Mesor</b> | <b>Acrophase</b> | <b>Interdaily stability</b> | <b>Intradaily variability</b> |
|-------------------------------|--------------------|------------------|--------------|------------------------|------------------|-----------------------------|-------------------------------|
| <b>F Statistic</b>            | 1                  | 0.14             | 0.17         | 0.23                   | -0.15            | 0.72                        | -0.45                         |
| <b>Amplitude</b>              |                    | 1                | 0.48         | 0.75                   | 0.00             | 0.10                        | -0.23                         |
| <b>Mesor</b>                  |                    |                  | 1            | 0.04                   | 0.00             | 0.18                        | -0.29                         |
| <b>Amplitude:Mesor</b>        |                    |                  |              | 1                      | -0.01            | 0.17                        | -0.32                         |
| <b>Acrophase</b>              |                    |                  |              |                        | 1                | -0.21                       | 0.01                          |
| <b>Interdaily stability</b>   |                    |                  |              |                        |                  | 1                           | -0.43                         |
| <b>Intradaily variability</b> |                    |                  |              |                        |                  |                             | 1                             |

**Table S2. Associations (Beta and 95% CI) between quintiles of rest-activity rhythm characteristics and level of ALT, AST, ALP, GGT, albumin and bilirubin, NHANES 2011 – 2014**

|                               | ALT, log(U/L)<br>median (IQR) | Beta (95% CI)       | AST, log(U/L)<br>median (IQR) | Beta (95% CI)        | ALP, log(U/L)<br>median (IQR) | Beta (95% CI)        | GGT, log(U/L)<br>median (IQR) | Beta (95% CI)       | Albumin, g/dL<br>median (IQR) | Beta (95% CI)        | Bilirubin, log(mg/dL)<br>median (IQR) | Beta (95% CI)        |
|-------------------------------|-------------------------------|---------------------|-------------------------------|----------------------|-------------------------------|----------------------|-------------------------------|---------------------|-------------------------------|----------------------|---------------------------------------|----------------------|
| <b>F Statistic</b>            |                               |                     |                               |                      |                               |                      |                               |                     |                               |                      |                                       |                      |
| Q1                            | 3.0 (2.8, 3.4)                | 0.06 (-0.002, 0.11) | 3.1 (2.9, 3.3)                | 0.05 (-0.01, 0.10)   | 4.2 (4.0, 4.4)                | 0.08 (0.04, 0.12)    | 3.0 (2.7, 3.5)                | 0.14 (0.06, 0.23)   | 4.2 (4.0-4.5)                 | -0.11 (-0.15, -0.06) | -0.5 (-0.7, -0.2)                     | -0.03 (-0.08, 0.02)  |
| Q2                            | 3.0 (2.8, 3.4)                | 0.09 (0.03, 0.14)   | 3.1 (2.9, 3.3)                | 0.04 (-0.004, 0.08)  | 4.2 (4.0, 4.4)                | 0.04 (0.004, 0.09)   | 3.0 (2.6, 3.4)                | 0.14 (0.07, 0.22)   | 4.3 (4.1-4.5)                 | -0.05 (-0.09, -0.01) | -0.5 (-0.7, -0.2)                     | -0.05 (-0.12, 0.01)  |
| Q3                            | 3.0 (2.8, 3.3)                | 0.02 (-0.02, 0.07)  | 3.1 (2.9, 3.3)                | 0.01 (-0.02, 0.05)   | 4.2 (4.0, 4.3)                | 0.03 (-0.01, 0.06)   | 2.9 (2.6, 3.4)                | 0.07 (0.01, 0.13)   | 4.3 (4.0-4.5)                 | -0.06 (-0.11, -0.02) | -0.5 (-0.7, -0.2)                     | -0.002 (-0.05, 0.05) |
| Q4                            | 3.0 (2.8, 3.3)                | 0.01 (-0.04, 0.06)  | 3.1 (2.9, 3.3)                | -0.002 (-0.04, 0.03) | 4.1 (3.9, 4.3)                | -0.01 (-0.04, 0.03)  | 2.9 (2.6, 3.3)                | 0.03 (-0.03, 0.10)  | 4.3 (4.1-4.5)                 | -0.02 (-0.06, 0.02)  | -0.5 (-0.7, -0.2)                     | 0.0004 (-0.03, 0.03) |
| Q5                            | 3.0 (2.8, 3.3)                | ref.                | 3.1 (2.9, 3.3)                | ref.                 | 4.1 (3.9, 4.3)                | ref.                 | 2.9 (2.6, 3.3)                | ref.                | 4.3 (4.1-4.5)                 | ref.                 | -0.5 (-0.7, -0.2)                     | ref.                 |
| P trend                       |                               | 0.004               |                               | 0.02                 |                               | <0.001               |                               | <0.001              |                               | <0.001               |                                       | 0.04                 |
| <b>Amplitude</b>              |                               |                     |                               |                      |                               |                      |                               |                     |                               |                      |                                       |                      |
| Q1                            | 3.0 (2.8, 3.3)                | 0.04 (-0.01, 0.09)  | 3.1 (2.9, 3.3)                | 0.04 (-0.01, 0.08)   | 4.2 (4.0, 4.4)                | 0.04 (0, 0.09)       | 3.0 (2.7, 3.5)                | 0.12 (0.02, 0.21)   | 4.2 (4.0- 4.4)                | -0.09 (-0.14, -0.04) | -0.5 (-0.7, -0.2)                     | -0.04 (-0.09, 0.01)  |
| Q2                            | 3.0 (2.8, 3.3)                | 0.05 (0.005, 0.09)  | 3.1 (2.9, 3.3)                | 0.02 (-0.02, 0.06)   | 4.2 (4.0, 4.3)                | 0.02 (-0.02, 0.05)   | 3.0 (2.6, 3.4)                | 0.08 (0.01, 0.15)   | 4.3 (4.0-4.5)                 | -0.04 (-0.09, 0.001) | -0.5 (-0.7, -0.2)                     | -0.03 (-0.09, 0.03)  |
| Q3                            | 3.0 (2.8, 3.3)                | 0.03 (-0.02, 0.08)  | 3.1 (2.9, 3.3)                | 0.01 (-0.02, 0.05)   | 4.1 (4.0, 4.3)                | 0.0001 (-0.04, 0.04) | 2.9 (2.6, 3.3)                | 0.03 (-0.06, 0.12)  | 4.3 (4.1-4.5)                 | -0.02 (-0.05, 0.01)  | -0.5 (-0.7, -0.2)                     | -0.01 (-0.05, 0.03)  |
| Q4                            | 3.0 (2.8, 3.3)                | 0.01 (-0.04, 0.06)  | 3.1 (2.9, 3.3)                | -0.004 (-0.03, 0.03) | 4.1 (4.0, 4.3)                | 0.005 (-0.04, 0.05)  | 2.9 (2.6, 3.3)                | 0.02 (-0.06, 0.09)  | 4.3 (4.1-4.5)                 | -0.01 (-0.05, 0.02)  | -0.5 (-0.7, -0.2)                     | 0.01 (-0.04, 0.06)   |
| Q5                            | 3.0 (2.8, 3.3)                | ref.                | 3.1 (2.9, 3.3)                | ref.                 | 4.1 (4.0, 4.3)                | ref.                 | 2.9 (2.6, 3.4)                | ref.                | 4.3 (4.1-4.5)                 | ref.                 | -0.5 (-0.7, -0.2)                     | ref.                 |
| P trend                       |                               | 0.04                |                               | 0.09                 |                               | 0.03                 |                               | 0.004               |                               | 0.002                |                                       | 0.06                 |
| <b>Mesor</b>                  |                               |                     |                               |                      |                               |                      |                               |                     |                               |                      |                                       |                      |
| Q1                            | 3.0 (2.8, 3.4)                | 0.04 (-0.02, 0.1)   | 3.1 (2.9, 3.3)                | 0.02 (-0.02, 0.07)   | 4.2 (4.0, 4.4)                | 0.02 (-0.02, 0.06)   | 3.0 (2.7, 3.5)                | 0.08 (-0.01, 0.17)  | 4.2 (4.0, 4.5)                | -0.04 (-0.09, 0.01)  | -0.5 (-0.7, -0.2)                     | -0.01 (-0.07, 0.05)  |
| Q2                            | 3.0 (2.8, 3.3)                | 0.01 (-0.04, 0.06)  | 3.1 (2.9, 3.3)                | -0.001 (-0.03, 0.03) | 4.2 (4.0, 4.4)                | -0.01 (-0.06, 0.04)  | 2.9 (2.6, 3.4)                | 0.004 (-0.07, 0.08) | 4.3 (4.1, 4.5)                | -0.01 (-0.04, 0.02)  | -0.5 (-0.7, -0.2)                     | 0.02 (-0.04, 0.08)   |
| Q3                            | 3.0 (2.8, 3.3)                | 0.02 (-0.03, 0.08)  | 3.1 (2.9, 3.3)                | 0.02 (-0.02, 0.06)   | 4.2 (4.0, 4.3)                | -0.01 (-0.06, 0.03)  | 3.0 (2.6, 3.4)                | 0.06 (-0.02, 0.13)  | 4.3 (4.1, 4.5)                | 0.001 (-0.04, 0.04)  | -0.5 (-0.7, -0.2)                     | 0.02 (-0.04, 0.08)   |
| Q4                            | 3.0 (2.8, 3.3)                | 0.01 (-0.04, 0.07)  | 3.1 (2.9, 3.3)                | 0.03 (-0.02, 0.07)   | 4.2 (4.0, 4.3)                | -0.02 (-0.06, 0.02)  | 2.9 (2.6, 3.3)                | -0.01 (-0.09, 0.07) | 4.3 (4.1, 4.5)                | 0.01 (-0.02, 0.05)   | -0.5 (-0.7, -0.2)                     | 0.06 (0.01, 0.12)    |
| Q5                            | 3.0 (2.8, 3.3)                | ref.                | 3.1 (2.9, 3.3)                | ref.                 | 4.2 (4.0, 4.3)                | ref.                 | 2.9 (2.6, 3.3)                | ref.                | 4.3 (4.1, 4.5)                | ref.                 | -0.5 (-0.7, -0.2)                     | ref.                 |
| P trend                       |                               | 0.25                |                               | 0.74                 |                               | 0.22                 |                               | 0.049               |                               | 0.04                 |                                       | 0.21                 |
| <b>Amplitude:Mesor</b>        |                               |                     |                               |                      |                               |                      |                               |                     |                               |                      |                                       |                      |
| Q1                            | 3.0 (2.8, 3.4)                | 0.04 (-0.01, 0.09)  | 3.1 (2.9, 3.3)                | 0.06 (0.01, 0.10)    | 4.2 (4.0, 4.4)                | 0.04 (-0.003, 0.08)  | 3.0 (2.7, 3.5)                | 0.10 (0.01, 0.20)   | 4.2 (4.0, 4.4)                | -0.09 (-0.13, -0.04) | -0.5 (-0.7, -0.2)                     | -0.02 (-0.06, 0.03)  |
| Q2                            | 3.0 (2.8, 3.3)                | -0.01 (-0.06, 0.04) | 3.1 (2.9, 3.3)                | -0.003 (-0.04, 0.03) | 4.2 (4.0, 4.3)                | 0.005 (-0.03, 0.04)  | 2.9 (2.6, 3.3)                | -0.01 (-0.08, 0.07) | 4.3 (4.1, 4.5)                | -0.002 (-0.04, 0.04) | -0.5 (-0.7, -0.2)                     | -0.01 (-0.06, 0.04)  |
| Q3                            | 3.0 (2.8, 3.3)                | -0.01 (-0.06, 0.04) | 3.1 (2.9, 3.3)                | -0.01 (-0.05, 0.02)  | 4.1 (4.0, 4.3)                | -0.005 (-0.04, 0.03) | 2.9 (2.6, 3.3)                | -0.01 (-0.09, 0.08) | 4.3 (4.1, 4.5)                | -0.01 (-0.04, 0.02)  | -0.5 (-0.7, -0.2)                     | -0.01 (-0.05, 0.03)  |
| Q4                            | 3.0 (2.8, 3.3)                | -0.02 (-0.07, 0.02) | 3.1 (2.9, 3.3)                | -0.004 (-0.04, 0.03) | 4.1 (4.0, 4.3)                | -0.01 (-0.04, 0.03)  | 2.9 (2.6, 3.4)                | -0.02 (-0.11, 0.06) | 4.3 (4.1, 4.5)                | 0.004 (-0.03, 0.03)  | -0.5 (-0.7, -0.2)                     | 0.03 (-0.01, 0.07)   |
| Q5                            | 3.0 (2.8, 3.3)                | ref.                | 3.1 (2.9, 3.3)                | ref.                 | 4.1 (4.0, 4.3)                | ref.                 | 2.9 (2.6, 3.4)                | ref.                | 4.3 (4.1, 4.5)                | ref.                 | -0.5 (-0.7, -0.2)                     | ref.                 |
| P trend                       |                               | 0.09                |                               | 0.046                |                               | 0.04                 |                               | 0.04                |                               | 0.003                |                                       | 0.09                 |
| <b>Acrophase</b>              |                               |                     |                               |                      |                               |                      |                               |                     |                               |                      |                                       |                      |
| Q1                            | 3.0 (2.8, 3.3)                | ref.                | 3.1 (2.9, 3.3)                | ref.                 | 4.2 (4.0, 4.3)                | ref.                 | 2.9 (2.6, 3.3)                | ref.                | 4.3 (4.1, 4.5)                | ref.                 | -0.5 (-0.7, -0.2)                     | ref.                 |
| Q2                            | 3.0 (2.8, 3.3)                | -0.01 (-0.05, 0.04) | 3.1 (2.9, 3.3)                | -0.005 (-0.05, 0.04) | 4.2 (4.0, 4.3)                | -0.02 (-0.05, 0.02)  | 2.9 (2.6, 3.4)                | -0.02 (-0.09, 0.06) | 4.3 (4.1, 4.5)                | -0.01 (-0.05, 0.03)  | -0.5 (-0.7, -0.2)                     | -0.03 (-0.08, 0.03)  |
| Q3                            | 3.0 (2.8, 3.3)                | -0.02 (-0.06, 0.03) | 3.1 (2.9, 3.3)                | -0.01 (-0.04, 0.01)  | 4.2 (4.0, 4.3)                | -0.02 (-0.06, 0.03)  | 2.9 (2.6, 3.4)                | -0.02 (-0.09, 0.06) | 4.3 (4.1, 4.5)                | 0.001 (-0.03, 0.03)  | -0.5 (-0.7, -0.2)                     | -0.01 (-0.06, 0.04)  |
| Q4                            | 3.0 (2.8, 3.4)                | -0.04 (-0.09, 0.01) | 3.1 (2.9, 3.3)                | -0.03 (-0.06, 0.01)  | 4.2 (4.0, 4.4)                | -0.03 (-0.06, 0.01)  | 2.9 (2.6, 3.4)                | -0.04 (-0.12, 0.04) | 4.3 (4.0, 4.5)                | -0.01 (-0.05, 0.03)  | -0.5 (-0.7, -0.2)                     | -0.03 (-0.09, 0.02)  |
| Q5                            | 3.0 (2.8, 3.4)                | 0.03 (-0.03, 0.08)  | 3.1 (3.0, 3.3)                | 0.01 (-0.03, 0.04)   | 4.2 (4.0, 4.4)                | 0.02 (-0.01, 0.06)   | 3.0 (2.7, 3.4)                | 0.04 (-0.04, 0.13)  | 4.3 (4.1, 4.5)                | -0.03 (-0.07, 0.02)  | -0.5 (-0.7, -0.2)                     | -0.01 (-0.07, 0.04)  |
| P trend                       |                               | 0.84                |                               | 0.62                 |                               | 0.50                 |                               | 0.54                |                               | 0.08                 |                                       | 0.78                 |
| <b>Interdaily stability</b>   |                               |                     |                               |                      |                               |                      |                               |                     |                               |                      |                                       |                      |
| Q1                            | 3.1 (2.8, 3.4)                | 0.02 (-0.04, 0.07)  | 3.1 (2.9, 3.3)                | 0.03 (-0.02, 0.07)   | 4.2 (4.0, 4.4)                | 0.06 (0.02, 0.1)     | 2.9 (2.6, 3.4)                | 0.05 (-0.04, 0.14)  | 4.3 (4.0, 4.5)                | -0.09 (-0.13, -0.05) | -0.5 (-0.7, -0.2)                     | -0.03 (-0.1, 0.03)   |
| Q2                            | 3.0 (2.8, 3.4)                | 0.01 (-0.05, 0.08)  | 3.1 (2.9, 3.3)                | 0.02 (-0.03, 0.07)   | 4.1 (3.9, 4.3)                | 0.03 (0, 0.07)       | 2.9 (2.6, 3.4)                | 0.06 (-0.01, 0.14)  | 4.3 (4.1, 4.5)                | -0.05 (-0.09, 0)     | -0.5 (-0.7, -0.2)                     | -0.01 (-0.06, 0.03)  |
| Q3                            | 3.0 (2.8, 3.3)                | -0.01 (-0.05, 0.04) | 3.1 (2.9, 3.3)                | -0.01 (-0.04, 0.03)  | 4.1 (3.9, 4.3)                | 0.01 (-0.03, 0.05)   | 3.0 (2.6, 3.4)                | 0.03 (-0.04, 0.09)  | 4.3 (4.1, 4.5)                | -0.07 (-0.12, -0.03) | -0.5 (-0.7, -0.2)                     | -0.01 (-0.05, 0.03)  |
| Q4                            | 3.0 (2.8, 3.3)                | -0.03 (-0.08, 0.02) | 3.1 (2.9, 3.3)                | -0.02 (-0.05, 0.02)  | 4.1 (4.0, 4.3)                | 0.02 (-0.03, 0.06)   | 2.9 (2.6, 3.3)                | -0.02 (-0.09, 0.04) | 4.3 (4.1, 4.5)                | -0.02 (-0.05, 0.02)  | -0.5 (-0.7, -0.2)                     | -0.03 (-0.07, 0.02)  |
| Q5                            | 3.0 (2.8, 3.3)                | ref.                | 3.1 (3.0, 3.3)                | ref.                 | 4.1 (4.0, 4.3)                | ref.                 | 2.9 (2.6, 3.3)                | ref.                | 4.3 (4.1, 4.5)                | ref.                 | -0.5 (-0.7, -0.2)                     | ref.                 |
| P trend                       |                               | 0.23                |                               | 0.07                 |                               | 0.001                |                               | 0.048               |                               | <0.001               |                                       | 0.36                 |
| <b>Intradaily variability</b> |                               |                     |                               |                      |                               |                      |                               |                     |                               |                      |                                       |                      |
| Q1                            | 3.0 (2.8, 3.4)                | ref.                | 3.1 (3.0, 3.3)                | ref.                 | 4.2 (4.0, 4.4)                | ref.                 | 2.9 (2.6, 3.4)                | ref.                | 4.3 (4.1, 4.5)                | ref.                 | -0.5 (-0.7, -0.2)                     | ref.                 |
| Q2                            | 3.0 (2.8, 3.3)                | 0.01 (-0.05, 0.06)  | 3.1 (2.9, 3.3)                | -0.01 (-0.05, 0.02)  | 4.1 (4.0, 4.3)                | 0 (-0.04, 0.04)      | 2.9 (2.6, 3.3)                | -0.01 (-0.08, 0.06) | 4.3 (4.1, 4.5)                | -0.01 (-0.04, 0.03)  | -0.5 (-0.7, -0.2)                     | 0.02 (-0.03, 0.07)   |
| Q3                            | 3.0 (2.8, 3.3)                | 0.02 (-0.03, 0.07)  | 3.1 (2.9, 3.3)                | 0.01 (-0.04, 0.05)   | 4.2 (4.0, 4.3)                | 0 (-0.04, 0.05)      | 2.9 (2.6, 3.3)                | -0.01 (-0.08, 0.07) | 4.3 (4.1, 4.5)                | -0.01 (-0.04, 0.02)  | -0.5 (-0.7, -0.2)                     | 0.02 (-0.03, 0.08)   |
| Q4                            | 3.0 (2.8, 3.4)                | 0.04 (-0.01, 0.1)   | 3.1 (3.0, 3.3)                | 0.03 (-0.01, 0.07)   | 4.1 (3.9, 4.3)                | -0.02 (-0.06, 0.03)  | 2.9 (2.6, 3.4)                | 0.05 (-0.01, 0.11)  | 4.3 (4.1, 4.5)                | -0.04 (-0.09, 0)     | -0.5 (-0.7, -0.2)                     | 0.02 (-0.05, 0.09)   |
| Q5                            | 3.0 (2.8, 3.3)                | 0.03 (-0.03, 0.08)  | 3.1 (2.9, 3.3)                | 0.03 (-0.02, 0.08)   | 4.1 (3.9, 4.3)                | 0.01 (-0.02, 0.05)   | 2.9 (2.6, 3.3)                | 0.04 (-0.03, 0.11)  | 4.3 (4.1, 4.5)                | -0.04 (-0.07, 0)     | -0.4 (-0.7, -0.2)                     | 0.02 (-0.04, 0.07)   |
| P trend                       |                               | 0.09                |                               | 0.045                |                               | 0.65                 |                               | 0.07                |                               | 0.01                 |                                       | 0.59                 |

Regression results presented as log-transformed liver enzyme levels.

Results based on model 2 adjusted for age, gender, race and ethnicity, education, household income, marital status, smoking, alcohol, hepatitis B, hepatitis C and hepatitis E.

Abbreviations: NHANES, National Health and Nutrition Examination Survey; ALT, alanine aminotransferase; AST, aspartate aminotransferase; ALP, alkaline phosphatase; GGT, gamma glutamyl transaminase; CI, confidence interval

**Table S3. Associations (Beta and 95% CI) between quintiles of rest-activity rhythm characteristics and level of ALT, AST, ALP, GGT, albumin and bilirubin, model 3 and 4, NHANES 2011 – 2014**

|                        | ALT, log(U/L)         |                      | AST, log(U/L)        |                      | ALP, log(U/L)        |                      | GGT, log(U/L)       |                      | Albumin, g/dL         |                      | Bilirubin, log(mg/dL) |                      |
|------------------------|-----------------------|----------------------|----------------------|----------------------|----------------------|----------------------|---------------------|----------------------|-----------------------|----------------------|-----------------------|----------------------|
|                        | Model 3               | Model 4              | Model 3              | Model 4              | Model 3              | Model 4              | Model 3             | Model 4              | Model 3               | Model 4              | Model 3               | Model 4              |
| <b>F Statistic</b>     |                       |                      |                      |                      |                      |                      |                     |                      |                       |                      |                       |                      |
| Q1                     | 0.04 (-0.02, 0.1)     | 0.02 (-0.04, 0.08)   | 0.04 (-0.01, 0.1)    | 0.04 (-0.02, 0.1)    | 0.08 (0.04, 0.11)    | 0.07 (0.03, 0.11)    | 0.12 (0.04, 0.2)    | 0.09 (-0.003, 0.18)  | -0.1 (-0.15, -0.05)   | -0.08 (-0.12, -0.03) | -0.03 (-0.08, 0.03)   | -0.01 (-0.07, 0.05)  |
| Q2                     | 0.08 (0.02, 0.14)     | 0.06 (0.003, 0.12)   | 0.03 (-0.01, 0.08)   | 0.03 (-0.01, 0.08)   | 0.04 (-0.003, 0.08)  | 0.03 (-0.01, 0.08)   | 0.12 (0.04, 0.21)   | 0.1 (0.02, 0.18)     | -0.04 (-0.09, 0.0002) | -0.03 (-0.07, 0.01)  | -0.05 (-0.11, 0.01)   | -0.04 (-0.1, 0.03)   |
| Q3                     | 0.02 (-0.03, 0.06)    | -0.002 (-0.05, 0.05) | 0.01 (-0.03, 0.05)   | 0.01 (-0.03, 0.05)   | 0.03 (-0.01, 0.06)   | 0.02 (-0.02, 0.06)   | 0.06 (-0.003, 0.12) | 0.03 (-0.03, 0.1)    | -0.06 (-0.1, -0.01)   | -0.04 (-0.09, 0.003) | 0.001 (-0.05, 0.06)   | 0.01 (-0.05, 0.07)   |
| Q4                     | 0.01 (-0.04, 0.05)    | -0.01 (-0.05, 0.04)  | -0.003 (-0.04, 0.03) | -0.004 (-0.04, 0.03) | -0.01 (-0.05, 0.03)  | -0.01 (-0.05, 0.03)  | 0.03 (-0.04, 0.09)  | 0.01 (-0.05, 0.07)   | -0.02 (-0.06, 0.02)   | -0.01 (-0.04, 0.02)  | 0.001 (-0.03, 0.03)   | 0.01 (-0.03, 0.04)   |
| Q5                     | ref.                  | ref.                 | ref.                 | ref.                 | ref.                 | ref.                 | ref.                | ref.                 | ref.                  | ref.                 | ref.                  | ref.                 |
| P trend                | 0.01                  | 0.07                 | 0.03                 | 0.04                 | <0.001               | <0.001               | 0.002               | 0.01                 | 0.001                 | 0.003                | 0.14                  | 0.35                 |
| <b>Amplitude</b>       |                       |                      |                      |                      |                      |                      |                     |                      |                       |                      |                       |                      |
| Q1                     | 0.02 (-0.03, 0.07)    | 0.01 (-0.04, 0.06)   | 0.03 (-0.02, 0.08)   | 0.03 (-0.02, 0.09)   | 0.03 (-0.01, 0.08)   | 0.03 (-0.02, 0.08)   | 0.09 (-0.01, 0.18)  | 0.07 (-0.02, 0.17)   | -0.08 (-0.13, -0.03)  | -0.07 (-0.12, -0.02) | -0.04 (-0.09, 0.02)   | -0.03 (-0.08, 0.03)  |
| Q2                     | 0.04 (-0.01, 0.09)    | 0.03 (-0.02, 0.08)   | 0.02 (-0.02, 0.06)   | 0.02 (-0.02, 0.06)   | 0.01 (-0.02, 0.04)   | 0.01 (-0.03, 0.04)   | 0.06 (-0.02, 0.13)  | 0.05 (-0.03, 0.12)   | -0.04 (-0.08, 0.01)   | -0.03 (-0.07, 0.02)  | -0.03 (-0.09, 0.03)   | -0.02 (-0.08, 0.04)  |
| Q3                     | 0.02 (-0.02, 0.07)    | 0.02 (-0.02, 0.07)   | 0.01 (-0.02, 0.05)   | 0.01 (-0.02, 0.05)   | -0.002 (-0.04, 0.04) | -0.003 (-0.05, 0.04) | 0.02 (-0.07, 0.12)  | 0.02 (-0.07, 0.11)   | -0.01 (-0.05, 0.02)   | -0.01 (-0.04, 0.02)  | -0.01 (-0.05, 0.03)   | -0.01 (-0.05, 0.03)  |
| Q4                     | 0.01 (-0.04, 0.06)    | 0.01 (-0.04, 0.05)   | -0.005 (-0.04, 0.03) | -0.004 (-0.04, 0.03) | 0.004 (-0.04, 0.05)  | 0.003 (-0.04, 0.05)  | 0.01 (-0.06, 0.09)  | 0.01 (-0.07, 0.09)   | -0.01 (-0.05, 0.02)   | -0.01 (-0.05, 0.03)  | 0.01 (-0.04, 0.06)    | 0.01 (-0.04, 0.07)   |
| Q5                     | ref.                  | ref.                 | ref.                 | ref.                 | ref.                 | ref.                 | ref.                | ref.                 | ref.                  | ref.                 | ref.                  | ref.                 |
| P trend                | 0.13                  | 0.31                 | 0.15                 | 0.14                 | 0.07                 | 0.14                 | 0.03                | 0.06                 | 0.005                 | 0.01                 | 0.08                  | 0.16                 |
| <b>Mesor</b>           |                       |                      |                      |                      |                      |                      |                     |                      |                       |                      |                       |                      |
| Q1                     | 0.03 (-0.03, 0.09)    | 0.01 (-0.05, 0.08)   | 0.02 (-0.03, 0.07)   | 0.02 (-0.03, 0.07)   | 0.01 (-0.03, 0.06)   | 0.01 (-0.04, 0.05)   | 0.06 (-0.03, 0.14)  | 0.04 (-0.06, 0.13)   | -0.03 (-0.08, 0.02)   | -0.02 (-0.06, 0.03)  | -0.01 (-0.07, 0.06)   | 0.01 (-0.06, 0.07)   |
| Q2                     | -0.0002 (-0.05, 0.05) | -0.01 (-0.06, 0.04)  | -0.003 (-0.03, 0.03) | -0.003 (-0.03, 0.03) | -0.01 (-0.06, 0.03)  | -0.02 (-0.07, 0.03)  | -0.01 (-0.08, 0.07) | -0.01 (-0.09, 0.06)  | -0.005 (-0.04, 0.03)  | 0.001 (-0.03, 0.04)  | 0.02 (-0.04, 0.08)    | 0.03 (-0.03, 0.09)   |
| Q3                     | 0.02 (-0.03, 0.07)    | 0.01 (-0.04, 0.07)   | 0.02 (-0.02, 0.06)   | 0.02 (-0.02, 0.06)   | -0.02 (-0.06, 0.03)  | -0.02 (-0.06, 0.03)  | 0.05 (-0.03, 0.13)  | 0.04 (-0.04, 0.11)   | 0.004 (-0.04, 0.05)   | 0.01 (-0.03, 0.05)   | 0.02 (-0.04, 0.08)    | 0.03 (-0.03, 0.09)   |
| Q4                     | 0.01 (-0.04, 0.07)    | 0.02 (-0.04, 0.07)   | 0.03 (-0.02, 0.07)   | 0.03 (-0.02, 0.08)   | -0.02 (-0.07, 0.02)  | -0.02 (-0.07, 0.03)  | -0.02 (-0.1, 0.07)  | -0.01 (-0.09, 0.08)  | 0.01 (-0.02, 0.05)    | 0.01 (-0.03, 0.05)   | 0.07 (0.01, 0.12)     | 0.06 (0.01, 0.12)    |
| Q5                     | ref.                  | ref.                 | ref.                 | ref.                 | ref.                 | ref.                 | ref.                | ref.                 | ref.                  | ref.                 | ref.                  | ref.                 |
| P trend                | 0.46                  | 0.99                 | 0.95                 | 0.98                 | 0.35                 | 0.60                 | 0.14                | 0.44                 | 0.05                  | 0.21                 | 0.24                  | 0.54                 |
| <b>Amplitude:Mesor</b> |                       |                      |                      |                      |                      |                      |                     |                      |                       |                      |                       |                      |
| Q1                     | 0.03 (-0.02, 0.07)    | 0.03 (-0.03, 0.08)   | 0.05 (-0.001, 0.1)   | 0.06 (0.001, 0.11)   | 0.03 (-0.01, 0.08)   | 0.04 (-0.01, 0.08)   | 0.08 (-0.02, 0.17)  | 0.08 (-0.02, 0.18)   | -0.08 (-0.12, -0.03)  | -0.07 (-0.12, -0.02) | -0.01 (-0.06, 0.03)   | -0.01 (-0.06, 0.04)  |
| Q2                     | -0.02 (-0.07, 0.03)   | -0.01 (-0.06, 0.04)  | -0.005 (-0.04, 0.03) | -0.004 (-0.04, 0.04) | 0.003 (-0.03, 0.03)  | 0.003 (-0.03, 0.04)  | -0.02 (-0.1, 0.06)  | -0.01 (-0.09, 0.07)  | 0.002 (-0.04, 0.04)   | 0.002 (-0.04, 0.05)  | -0.01 (-0.06, 0.04)   | -0.01 (-0.06, 0.04)  |
| Q3                     | -0.01 (-0.06, 0.04)   | -0.003 (-0.05, 0.05) | -0.02 (-0.05, 0.02)  | -0.01 (-0.05, 0.02)  | -0.01 (-0.04, 0.03)  | -0.005 (-0.05, 0.04) | -0.02 (-0.1, 0.07)  | -0.004 (-0.09, 0.08) | -0.01 (-0.04, 0.02)   | -0.01 (-0.04, 0.02)  | -0.01 (-0.05, 0.03)   | -0.01 (-0.05, 0.03)  |
| Q4                     | -0.02 (-0.07, 0.02)   | -0.02 (-0.07, 0.03)  | -0.005 (-0.04, 0.03) | -0.003 (-0.04, 0.03) | -0.01 (-0.05, 0.03)  | -0.01 (-0.05, 0.03)  | -0.03 (-0.11, 0.06) | -0.02 (-0.11, 0.07)  | 0.01 (-0.03, 0.04)    | 0.002 (-0.03, 0.04)  | 0.03 (-0.01, 0.07)    | 0.03 (-0.01, 0.07)   |
| Q5                     | ref.                  | ref.                 | ref.                 | ref.                 | ref.                 | ref.                 | ref.                | ref.                 | ref.                  | ref.                 | ref.                  | ref.                 |
| P trend                | 0.25                  | 0.24                 | 0.07                 | 0.06                 | 0.07                 | 0.11                 | 0.12                | 0.12                 | 0.01                  | 0.02                 | 0.19                  | 0.24                 |
| <b>Acrophase</b>       |                       |                      |                      |                      |                      |                      |                     |                      |                       |                      |                       |                      |
| Q1                     | 0.02 (-0.03, 0.06)    | 0.01 (-0.04, 0.06)   | 0.01 (-0.01, 0.04)   | 0.01 (-0.01, 0.04)   | 0.02 (-0.03, 0.06)   | 0.01 (-0.04, 0.06)   | 0.02 (-0.07, 0.1)   | 0.01 (-0.07, 0.09)   | -0.001 (-0.03, 0.03)  | 0.003 (-0.03, 0.04)  | 0.01 (-0.04, 0.06)    | 0.02 (-0.04, 0.07)   |
| Q2                     | 0.01 (-0.04, 0.06)    | 0.01 (-0.04, 0.06)   | 0.01 (-0.03, 0.05)   | 0.01 (-0.04, 0.05)   | -0.001 (-0.04, 0.04) | -0.002 (-0.04, 0.04) | -0.001 (-0.1, 0.1)  | -0.01 (-0.11, 0.09)  | -0.01 (-0.04, 0.02)   | -0.01 (-0.04, 0.02)  | -0.01 (-0.07, 0.05)   | -0.01 (-0.07, 0.05)  |
| Q3                     | ref.                  | ref.                 | ref.                 | ref.                 | ref.                 | ref.                 | ref.                | ref.                 | ref.                  | ref.                 | ref.                  | ref.                 |
| Q4                     | -0.02 (-0.09, 0.04)   | -0.02 (-0.09, 0.05)  | -0.01 (-0.05, 0.02)  | -0.01 (-0.05, 0.03)  | -0.01 (-0.06, 0.03)  | -0.02 (-0.06, 0.03)  | -0.03 (-0.13, 0.07) | -0.03 (-0.13, 0.07)  | -0.01 (-0.05, 0.03)   | -0.01 (-0.05, 0.03)  | -0.02 (-0.07, 0.03)   | -0.02 (-0.07, 0.03)  |
| Q5                     | 0.04 (-0.02, 0.1)     | 0.03 (-0.03, 0.09)   | 0.02 (-0.02, 0.06)   | 0.02 (-0.03, 0.06)   | 0.04 (0.003, 0.07)   | 0.03 (-0.003, 0.07)  | 0.05 (-0.06, 0.16)  | 0.05 (-0.06, 0.15)   | -0.02 (-0.07, 0.02)   | -0.02 (-0.07, 0.03)  | 0.002 (-0.06, 0.06)   | 0.005 (-0.06, 0.07)  |
| P trend                | 0.98                  | 0.84                 | 0.53                 | 0.55                 | 0.59                 | 0.62                 | 0.73                | 0.54                 | 0.35                  | 0.35                 | 0.55                  | 0.51                 |
| <b>IS</b>              |                       |                      |                      |                      |                      |                      |                     |                      |                       |                      |                       |                      |
| Q1                     | 0.01 (-0.05, 0.07)    | 0.004 (-0.06, 0.07)  | 0.02 (-0.02, 0.07)   | 0.03 (-0.03, 0.08)   | 0.06 (0.02, 0.09)    | 0.05 (0.02, 0.09)    | 0.03 (-0.05, 0.12)  | 0.03 (-0.06, 0.13)   | -0.08 (-0.12, -0.04)  | -0.07 (-0.11, -0.03) | -0.03 (-0.1, 0.04)    | -0.02 (-0.09, 0.05)  |
| Q2                     | 0.01 (-0.06, 0.08)    | -0.005 (-0.08, 0.07) | 0.02 (-0.03, 0.07)   | 0.02 (-0.03, 0.07)   | 0.03 (-0.005, 0.07)  | 0.03 (-0.01, 0.06)   | 0.05 (-0.03, 0.13)  | 0.04 (-0.05, 0.12)   | -0.04 (-0.09, 0.002)  | -0.03 (-0.07, 0.01)  | -0.01 (-0.05, 0.03)   | -0.001 (-0.05, 0.04) |
| Q3                     | -0.02 (-0.06, 0.03)   | -0.02 (-0.07, 0.03)  | -0.01 (-0.05, 0.03)  | -0.01 (-0.05, 0.04)  | 0.01 (-0.03, 0.05)   | 0.004 (-0.04, 0.05)  | 0.01 (-0.06, 0.08)  | 0.01 (-0.06, 0.08)   | -0.07 (-0.11, -0.02)  | -0.06 (-0.1, -0.02)  | -0.01 (-0.05, 0.04)   | -0.01 (-0.05, 0.04)  |
| Q4                     | -0.04 (-0.09, 0.01)   | -0.03 (-0.08, 0.01)  | -0.02 (-0.06, 0.02)  | -0.01 (-0.05, 0.02)  | 0.02 (-0.03, 0.06)   | 0.02 (-0.03, 0.06)   | -0.03 (-0.1, 0.03)  | -0.03 (-0.09, 0.04)  | -0.01 (-0.04, 0.02)   | -0.01 (-0.04, 0.02)  | -0.03 (-0.07, 0.02)   | -0.02 (-0.07, 0.03)  |
| Q5                     | ref.                  | ref.                 | ref.                 | ref.                 | ref.                 | ref.                 | ref.                | ref.                 | ref.                  | ref.                 | ref.                  | ref.                 |
| P trend                | 0.37                  | 0.60                 | 0.10                 | 0.11                 | 0.003                | 0.01                 | 0.09                | 0.18                 | 0.001                 | 0.002                | 0.46                  | 0.75                 |
| <b>IV</b>              |                       |                      |                      |                      |                      |                      |                     |                      |                       |                      |                       |                      |
| Q1                     | ref.                  | ref.                 | ref.                 | ref.                 | ref.                 | ref.                 | ref.                | ref.                 | ref.                  | ref.                 | ref.                  | ref.                 |
| Q2                     | 0.004 (-0.05, 0.06)   | 0.01 (-0.05, 0.07)   | -0.01 (-0.05, 0.02)  | -0.01 (-0.05, 0.03)  | -0.004 (-0.05, 0.04) | -0.002 (-0.04, 0.04) | -0.02 (-0.09, 0.05) | -0.01 (-0.08, 0.06)  | -0.01 (-0.04, 0.03)   | -0.01 (-0.04, 0.03)  | 0.02 (-0.03, 0.07)    | 0.02 (-0.03, 0.07)   |
| Q3                     | 0.02 (-0.03, 0.07)    | 0.02 (-0.03, 0.07)   | 0.01 (-0.04, 0.05)   | 0.01 (-0.04, 0.05)   | 0.001 (-0.05, 0.05)  | -0.00 (-0.05, 0.05)  | -0.02 (-0.1, 0.06)  | -0.01 (-0.09, 0.07)  | -0.002 (-0.03, 0.03)  | -0.004 (-0.03, 0.03) | 0.03 (-0.03, 0.09)    | 0.02 (-0.04, 0.08)   |
| Q4                     | 0.04 (-0.02, 0.1)     | 0.04 (-0.02, 0.09)   | 0.02 (-0.02, 0.07)   | 0.03 (-0.02, 0.07)   | -0.02 (-0.07, 0.02)  | -0.02 (-0.07, 0.03)  | 0.03 (-0.03, 0.1)   | 0.04 (-0.02, 0.09)   | -0.04 (-0.08, 0.004)  | -0.04 (-0.08, 0.005) | 0.02 (-0.05, 0.09)    | 0.02 (-0.05, 0.1)    |
| Q5                     | 0.01 (-0.04, 0.07)    | 0.02 (-0.03, 0.07)   | 0.03 (-0.02, 0.08)   | 0.03 (-0.02, 0.08)   | 0.01 (-0.02, 0.04)   | 0.01 (-0.02, 0.04)   | 0.01 (-0.05, 0.08)  | 0.03 (-0.05, 0.1)    | -0.03 (-0.07, 0.01)   | -0.03 (-0.06, 0.01)  | 0.02 (-0.04, 0.08)    | 0.03 (-0.03, 0.09)   |
| P trend                | 0.25                  | 0.18                 | 0.07                 | 0.06                 | 0.98                 | 1.00                 | 0.23                | 0.18                 | 0.045                 | 0.04                 | 0.46                  | 0.36                 |

Regression results presented as log-transformed liver enzyme levels.

Model 3: adjusted for age, gender, race and ethnicity, education, household income, marital status, smoking, alcohol, hepatitis B, hepatitis C, hepatitis E and diabetes status.

Model 4: adjusted for age, gender, race and ethnicity, education, household income, marital status, smoking, alcohol, hepatitis B, hepatitis C, hepatitis E and BMI.

Abbreviations: NHANES, National Health and Nutrition Examination Survey; ALT, alanine aminotransferase; AST, aspartate aminotransferase; ALP, alkaline phosphatase; GGT, gamma glutamyl transaminase; CI, confidence interval; IS, Interdaily stability; IV, Intradaily variability

**Table S4. Associations (OR and 95% CI) between quintiles of rest-activity rhythm characteristics and abnormal levels of ALT, AST, ALP, GGT, albumin and bilirubin, adjusting for physical activity and sleeping duration, NHANES 2011 – 2014**

|                             | ALT               | AST               | ALP               | GGT               | Albumin            | Bilirubin         |
|-----------------------------|-------------------|-------------------|-------------------|-------------------|--------------------|-------------------|
| <b>F statistic</b>          |                   |                   |                   |                   |                    |                   |
| Q1                          | 1.02 (0.57, 1.84) | 1.41 (0.87, 2.27) | 1.84 (0.70, 4.81) | 1.78 (1.06, 2.97) | 3.61 (1.38, 9.46)  | 1.78 (0.93, 3.43) |
| Q2                          | 1.31 (0.79, 2.16) | 1.34 (0.90, 1.99) | 1.15 (0.42, 3.15) | 1.68 (0.94, 2.98) | 1.78 (0.63, 4.97)  | 1.05 (0.44, 2.52) |
| Q3                          | 1.00 (0.69, 1.45) | 0.81 (0.52, 1.27) | 0.81 (0.43, 1.52) | 1.04 (0.68, 1.59) | 1 (0.32, 3.06)     | 1.26 (0.57, 2.77) |
| Q4                          | 0.79 (0.47, 1.31) | 0.90 (0.55, 1.48) | 0.31 (0.10, 0.92) | 1.05 (0.68, 1.63) | 1.36 (0.47, 3.91)  | 0.9 (0.4, 2.04)   |
| Q5                          | ref.              | ref.              | ref.              | ref.              | ref.               | ref.              |
| P trend                     | 0.26              | 0.04              | 0.04              | 0.02              | 0.02               | 0.26              |
| <b>Amplitude</b>            |                   |                   |                   |                   |                    |                   |
| Q1                          | 1.18 (0.67, 2.07) | 1.50 (0.81, 2.77) | 2.03 (0.61, 6.75) | 1.50 (0.88, 2.57) | 1.5 (0.49, 4.59)   | 1.92 (0.81, 4.57) |
| Q2                          | 1.34 (0.81, 2.22) | 1.17 (0.70, 1.96) | 1.27 (0.46, 3.52) | 1.28 (0.81, 2.03) | 0.76 (0.26, 2.19)  | 0.95 (0.28, 3.23) |
| Q3                          | 1.01 (0.59, 1.75) | 1.12 (0.65, 1.91) | 0.73 (0.25, 2.17) | 1.10 (0.65, 1.85) | 0.51 (0.16, 1.65)  | 1.96 (0.74, 5.15) |
| Q4                          | 0.89 (0.46, 1.74) | 0.80 (0.40, 1.62) | 2.04 (0.84, 4.91) | 1.10 (0.63, 1.91) | 0.61 (0.21, 1.78)  | 2.03 (0.83, 4.96) |
| Q5                          | ref.              | ref.              | ref.              | ref.              | ref.               | ref.              |
| P trend                     | 0.11              | 0.06              | 0.49              | 0.05              | 0.4                | 0.047             |
| <b>Mesor</b>                |                   |                   |                   |                   |                    |                   |
| Q1                          | 1.12 (0.66, 1.89) | 1.23 (0.65, 2.32) | 1.09 (0.43, 2.74) | 0.94 (0.50, 1.75) | 0.81 (0.22, 3.03)  | 1.41 (0.54, 3.72) |
| Q2                          | 0.91 (0.54, 1.54) | 0.84 (0.45, 1.57) | 0.58 (0.23, 1.45) | 0.71 (0.44, 1.12) | 1.03 (0.27, 3.89)  | 1.39 (0.57, 3.39) |
| Q3                          | 1.26 (0.86, 1.84) | 1.27 (0.77, 2.11) | 0.58 (0.29, 1.15) | 0.96 (0.58, 1.61) | 1.18 (0.49, 2.84)  | 0.56 (0.21, 1.44) |
| Q4                          | 1.08 (0.71, 1.64) | 1.13 (0.65, 1.96) | 0.47 (0.19, 1.14) | 0.84 (0.56, 1.26) | 0.98 (0.38, 2.5)   | 1.19 (0.49, 2.9)  |
| Q5                          | ref.              | ref.              | ref.              | ref.              | ref.               | ref.              |
| P trend                     | 0.98              | 0.89              | 0.66              | 0.62              | 0.5                | 0.97              |
| <b>Amplitude:Mesor</b>      |                   |                   |                   |                   |                    |                   |
| Q1                          | 1.34 (0.84, 2.13) | 1.65 (1.05, 2.60) | 1.73 (0.69, 4.37) | 1.50 (0.95, 2.39) | 1.29 (0.5, 3.34)   | 1.72 (0.71, 4.21) |
| Q2                          | 1.12 (0.72, 1.73) | 0.94 (0.59, 1.52) | 1.58 (0.74, 3.39) | 0.81 (0.51, 1.27) | 0.52 (0.21, 1.31)  | 1.28 (0.45, 3.63) |
| Q3                          | 1.01 (0.61, 1.67) | 0.88 (0.53, 1.45) | 1.12 (0.44, 2.84) | 0.99 (0.63, 1.57) | 0.55 (0.22, 1.39)  | 1.56 (0.68, 3.57) |
| Q4                          | 0.98 (0.58, 1.67) | 1.00 (0.66, 1.52) | 1.31 (0.46, 3.68) | 0.88 (0.53, 1.47) | 0.45 (0.2, 0.99)   | 2.08 (0.74, 5.85) |
| Q5                          | ref.              | ref.              | ref.              | ref.              | ref.               | ref.              |
| P trend                     | 0.12              | 0.07              | 0.15              | 0.09              | 0.33               | 0.12              |
| <b>Acrophase</b>            |                   |                   |                   |                   |                    |                   |
| Q1                          | ref.              | ref.              | ref.              | ref.              | ref.               | ref.              |
| Q2                          | 1.02 (0.64, 1.63) | 0.99 (0.57, 1.72) | 1.1 (0.54, 2.24)  | 0.98 (0.61, 1.58) | 1.02 (0.44, 2.36)  | 0.96 (0.36, 2.55) |
| Q3                          | 0.89 (0.55, 1.44) | 0.95 (0.61, 1.46) | 0.68 (0.28, 1.65) | 0.95 (0.54, 1.67) | 1.38 (0.55, 3.48)  | 1.94 (0.79, 4.76) |
| Q4                          | 0.93 (0.59, 1.46) | 0.97 (0.63, 1.50) | 0.64 (0.31, 1.34) | 0.86 (0.52, 1.41) | 1.21 (0.51, 2.85)  | 1.3 (0.51, 3.32)  |
| Q5                          | 0.91 (0.55, 1.53) | 1.06 (0.65, 1.74) | 0.93 (0.54, 1.60) | 1.14 (0.72, 1.79) | 1.52 (0.75, 3.1)   | 1.73 (0.71, 4.18) |
| P trend                     | 0.55              | 0.84              | 0.20              | 0.82              | 0.43               | 0.03              |
| <b>Interdaily stability</b> |                   |                   |                   |                   |                    |                   |
| Q1                          | 0.77 (0.44, 1.35) | 1.35 (0.82, 2.21) | 2.21 (0.96, 5.11) | 1.52 (0.91, 2.55) | 3.63 (1.27, 10.35) | 1.63 (0.72, 3.69) |
| Q2                          | 0.93 (0.51, 1.68) | 1.28 (0.75, 2.18) | 1.06 (0.42, 2.7)  | 1.35 (0.79, 2.32) | 1.53 (0.46, 5.06)  | 2.64 (0.95, 7.29) |

|                               |                   |                   |                   |                   |                   |                    |
|-------------------------------|-------------------|-------------------|-------------------|-------------------|-------------------|--------------------|
| Q3                            | 0.8 (0.48, 1.34)  | 0.97 (0.58, 1.62) | 1.08 (0.49, 2.37) | 1.04 (0.66, 1.63) | 2.51 (0.79, 7.99) | 1.75 (0.82, 3.74)  |
| Q4                            | 0.72 (0.48, 1.08) | 0.79 (0.55, 1.15) | 1.1 (0.45, 2.72)  | 0.95 (0.59, 1.53) | 1.67 (0.5, 5.52)  | 1.23 (0.5, 3.01)   |
| Q5                            | ref.              | ref.              | ref.              | ref.              | ref.              | ref.               |
| P trend                       | 0.63              | 0.08              | 0.11              | 0.047             | 0.006             | 0.03               |
| <b>Intradaily variability</b> |                   |                   |                   |                   |                   |                    |
| Q1                            | ref.              | ref.              | ref.              | ref.              | ref.              | ref.               |
| Q2                            | 0.9 (0.52, 1.56)  | 0.88 (0.51, 1.51) | 0.76 (0.34, 1.73) | 0.92 (0.64, 1.34) | 1.41 (0.48, 4.15) | 2.41 (0.62, 9.32)  |
| Q3                            | 1.01 (0.57, 1.8)  | 1.05 (0.58, 1.89) | 1.1 (0.49, 2.44)  | 0.91 (0.59, 1.41) | 1.14 (0.36, 3.57) | 2.88 (0.87, 9.51)  |
| Q4                            | 1.17 (0.66, 2.09) | 1.01 (0.54, 1.89) | 0.61 (0.26, 1.44) | 1.13 (0.8, 1.6)   | 2.49 (0.72, 8.66) | 5.49 (1.25, 24.01) |
| Q5                            | 0.84 (0.53, 1.32) | 1.36 (0.72, 2.56) | 1.98 (0.72, 5.46) | 1.11 (0.69, 1.79) | 2.26 (0.74, 6.91) | 3.04 (0.68, 13.61) |
| P trend                       | 0.93              | 0.26              | 0.18              | 0.37              | 0.03              | 0.02               |

Abnormal levels defined as >47 IU/L in men or >30 IU/L in women for ALT, >33 IU/L for AST, >113 IU/L for ALP, >65 IU/L in men or >36 IU/L in women for GGT, <3.7 g/dL for albumin, and >1.3 mg/dL for bilirubin

Model adjusted for age, gender, race and ethnicity, education, household income, marital status, smoking, alcohol, hepatitis B, hepatitis C, hepatitis E, physical activity and sleeping duration

Abbreviations: NHANES, National Health and Nutrition Examination Survey; ALT, alanine aminotransferase; AST, aspartate aminotransferase; ALP, alkaline phosphatase; GGT, gamma glutamyl transaminase

**Table S5. Associations (OR and 95% CI) between quintiles of F statistic and abnormal levels of ALT, AST, ALP, GGT, albumin and bilirubin, after removing night shift worker proxied by L5MD, NHANES 2011 – 2014**

| Abnormal levels of liver enzymes | F Statistic        |                   |                   |                   |                | P trend |
|----------------------------------|--------------------|-------------------|-------------------|-------------------|----------------|---------|
|                                  | Q1                 | Q2                | Q3                | Q4                | Q5             |         |
| <b>F statistic, median (IQR)</b> | 189 (140, 230)     | 325 (294, 354)    | 453 (421, 481)    | 599 (560, 651)    | 851 (764, 999) |         |
| <b>ALT</b>                       |                    |                   |                   |                   |                |         |
| <b>N (%)<sup>b</sup></b>         | 128 (11)           | 136 (12)          | 136 (11)          | 99 (8.1)          | 122 (9.8)      |         |
| <b>OR (95% CI)</b>               |                    |                   |                   |                   |                |         |
| <b>Model 1</b>                   | 1.22 (0.84, 1.79)  | 1.3 (0.89, 1.89)  | 1.12 (0.83, 1.52) | 0.82 (0.56, 1.19) | ref.           | 0.04    |
| <b>Model 2</b>                   | 1.2 (0.71, 2.02)   | 1.37 (0.83, 2.24) | 1.12 (0.76, 1.64) | 0.85 (0.53, 1.36) | ref.           | 0.12    |
| <b>Model 3</b>                   | 1.08 (0.62, 1.86)  | 1.26 (0.75, 2.12) | 1.05 (0.69, 1.58) | 0.82 (0.51, 1.3)  | ref.           | 0.27    |
| <b>Model 4</b>                   | 1.04 (0.58, 1.87)  | 1.23 (0.74, 2.05) | 1.02 (0.68, 1.55) | 0.81 (0.49, 1.32) | ref.           | 0.34    |
| <b>AST</b>                       |                    |                   |                   |                   |                |         |
| <b>N (%)<sup>b</sup></b>         | 157 (14)           | 149 (11)          | 111 (8.2)         | 100 (8.4)         | 102 (8.7)      |         |
| <b>OR (95% CI)</b>               |                    |                   |                   |                   |                |         |
| <b>Model 1</b>                   | 1.6 (1.18, 2.16)   | 1.3 (0.98, 1.73)  | 0.9 (0.66, 1.21)  | 0.93 (0.68, 1.28) | ref.           | 0.001   |
| <b>Model 2</b>                   | 1.44 (0.92, 2.25)  | 1.35 (0.93, 1.95) | 0.84 (0.57, 1.24) | 0.92 (0.6, 1.4)   | ref.           | 0.04    |
| <b>Model 3</b>                   | 1.31 (0.83, 2.08)  | 1.27 (0.86, 1.87) | 0.8 (0.53, 1.19)  | 0.89 (0.59, 1.36) | ref.           | 0.09    |
| <b>Model 4</b>                   | 1.38 (0.83, 2.27)  | 1.3 (0.88, 1.93)  | 0.82 (0.54, 1.24) | 0.91 (0.58, 1.41) | ref.           | 0.07    |
| <b>ALP</b>                       |                    |                   |                   |                   |                |         |
| <b>N (%)<sup>b</sup></b>         | 65 (5.9)           | 43 (3.6)          | 30 (2.2)          | 19 (0.8)          | 30 (2.2)       |         |
| <b>OR (95% CI)</b>               |                    |                   |                   |                   |                |         |
| <b>Model 1</b>                   | 3.16 (1.9, 5.25)   | 1.74 (0.88, 3.43) | 1.09 (0.72, 1.67) | 0.37 (0.17, 0.8)  | ref.           | <0.001  |
| <b>Model 2</b>                   | 2.55 (1.48, 4.41)  | 1.53 (0.72, 3.24) | 1.02 (0.61, 1.7)  | 0.32 (0.11, 0.93) | ref.           | <0.001  |
| <b>Model 3</b>                   | 2.24 (1.27, 3.94)  | 1.39 (0.64, 3)    | 0.95 (0.57, 1.61) | 0.3 (0.1, 0.89)   | ref.           | 0.001   |
| <b>Model 4</b>                   | 2.44 (1.31, 4.55)  | 1.39 (0.63, 3.09) | 0.95 (0.54, 1.67) | 0.25 (0.08, 0.77) | ref.           | 0.001   |
| <b>GGT</b>                       |                    |                   |                   |                   |                |         |
| <b>N (%)<sup>b</sup></b>         | 160 (14)           | 143 (12)          | 127 (7.9)         | 103 (7.5)         | 86 (6.8)       |         |
| <b>OR (95% CI)</b>               |                    |                   |                   |                   |                |         |
| <b>Model 1</b>                   | 2.5 (1.76, 3.55)   | 2.02 (1.32, 3.09) | 1.29 (0.94, 1.77) | 1.16 (0.82, 1.64) | ref.           | <0.001  |
| <b>Model 2</b>                   | 2.31 (1.44, 3.72)  | 1.99 (1.15, 3.43) | 1.2 (0.81, 1.78)  | 1.17 (0.77, 1.78) | ref.           | 0.002   |
| <b>Model 3</b>                   | 2.08 (1.3, 3.33)   | 1.83 (1.04, 3.22) | 1.13 (0.75, 1.7)  | 1.12 (0.74, 1.69) | ref.           | 0.004   |
| <b>Model 4</b>                   | 1.97 (1.15, 3.35)  | 1.75 (0.97, 3.18) | 1.07 (0.7, 1.66)  | 1.1 (0.71, 1.7)   | ref.           | 0.01    |
| <b>Albumin</b>                   |                    |                   |                   |                   |                |         |
| <b>N (%)<sup>b</sup></b>         | 73 (5.5)           | 39 (2.9)          | 29 (1.5)          | 26 (2)            | 11 (1.1)       |         |
| <b>OR (95% CI)</b>               |                    |                   |                   |                   |                |         |
| <b>Model 1</b>                   | 6.33 (2.94, 13.67) | 2.96 (1.35, 6.51) | 1.56 (0.65, 3.71) | 2.02 (0.86, 4.71) | ref.           | <0.001  |
| <b>Model 2</b>                   | 4.45 (1.76, 11.23) | 2.35 (0.95, 5.85) | 1.17 (0.41, 3.3)  | 1.4 (0.52, 3.78)  | ref.           | 0.002   |
| <b>Model 3</b>                   | 3.99 (1.54, 10.33) | 2.12 (0.82, 5.48) | 1.08 (0.36, 3.24) | 1.34 (0.49, 3.62) | ref.           | 0.003   |
| <b>Model 4</b>                   | 3.71 (1.33, 10.32) | 1.87 (0.68, 5.17) | 0.99 (0.32, 3.1)  | 1.25 (0.43, 3.64) | ref.           | 0.01    |
| <b>Bilirubin</b>                 |                    |                   |                   |                   |                |         |

| <b>N (%)<sup>b</sup></b> | 45 (4.4)          | 24 (2.3)          | 31 (3)            | 33 (2.5)          | 30 (2.6) |      |
|--------------------------|-------------------|-------------------|-------------------|-------------------|----------|------|
| <b>OR (95% CI)</b>       |                   |                   |                   |                   |          |      |
| <b>Model 1</b>           | 1.48 (0.9, 2.42)  | 0.83 (0.4, 1.72)  | 1.04 (0.56, 1.94) | 0.92 (0.48, 1.76) | ref.     | 0.29 |
| <b>Model 2</b>           | 1.55 (0.83, 2.89) | 0.84 (0.37, 1.89) | 1.04 (0.51, 2.12) | 0.8 (0.37, 1.69)  | ref.     | 0.25 |
| <b>Model 3</b>           | 1.52 (0.8, 2.9)   | 0.83 (0.37, 1.87) | 1.02 (0.49, 2.14) | 0.79 (0.36, 1.73) | ref.     | 0.27 |
| <b>Model 4</b>           | 1.65 (0.83, 3.28) | 0.89 (0.39, 2.05) | 1.1 (0.5, 2.45)   | 0.84 (0.36, 1.94) | ref.     | 0.19 |

Abnormal levels defined as >47 IU/L in men or >30 IU/L in women for ALT, >33 IU/L for AST, >113 IU/L for ALP, >65 IU/L in men or >36 IU/L in women for GGT, <3.7 g/dL for albumin, and >1.3 mg/dL for bilirubin

<sup>b</sup>Percentage weighted using sample weights.

Model 1: adjusted for age and gender.

Model 2: adjusted for age, gender, race and ethnicity, education, household income, marital status, smoking, alcohol, hepatitis B, hepatitis C and hepatitis E.

Model 3: adjusted for age, gender, race and ethnicity, education, household income, marital status, smoking, alcohol, hepatitis B, hepatitis C, hepatitis E and diabetes status.

Model 4: adjusted for age, gender, race and ethnicity, education, household income, marital status, smoking, alcohol, hepatitis B, hepatitis C, hepatitis E and BMI.

Abbreviations: NHANES, National Health and Nutrition Examination Survey; ALT, alanine aminotransferase; AST, aspartate aminotransferase; ALP, alkaline phosphatase; GGT, gamma glutamyl transaminase; IQR, interquartile range; CI, confidence interval; OR, odds ratio



**Table S6. Associations (OR and 95% CI) between quintiles of rest-activity rhythm characteristics and abnormal levels of ALT, AST, ALP and GGT, stratified by alcohol drinking status, NHANES 2011 – 2014**

|                               | ALT                |                    | AST                |                   | ALP                |                    | GGT                |                   |
|-------------------------------|--------------------|--------------------|--------------------|-------------------|--------------------|--------------------|--------------------|-------------------|
|                               | Never/former/light | Moderate/heavy     | Never/former/light | Moderate/heavy    | Never/former/light | Moderate/heavy     | Never/former/light | Moderate/heavy    |
| <b>F statistic</b>            |                    |                    |                    |                   |                    |                    |                    |                   |
| Q1                            | 1.22 (0.73, 2.04)  | 1.19 (0.45, 3.11)  | 1.34 (0.79, 2.25)  | 1.66 (0.77, 3.55) | 1.84 (1.11, 3.05)  | 7.61 (1.54, 37.73) | 2.36 (1.51, 3.68)  | 1.67 (0.65, 4.26) |
| Q2                            | 1.53 (0.91, 2.58)  | 1.18 (0.45, 3.06)  | 1.25 (0.82, 1.9)   | 1.48 (0.75, 2.91) | 1.33 (0.66, 2.7)   | 0.56 (0.05, 6.4)   | 1.97 (1.18, 3.29)  | 1.74 (0.67, 4.51) |
| Q3                            | 1.13 (0.72, 1.75)  | 0.98 (0.52, 1.84)  | 0.81 (0.47, 1.4)   | 0.83 (0.43, 1.6)  | 0.79 (0.42, 1.48)  | 1.97 (0.19, 20.63) | 1.14 (0.8, 1.63)   | 1.17 (0.56, 2.48) |
| Q4                            | 1.03 (0.67, 1.58)  | 0.34 (0.13, 0.88)  | 1.06 (0.67, 1.67)  | 0.5 (0.23, 1.08)  | 0.33 (0.12, 0.9)   | 0.29 (0.01, 6.69)  | 1.42 (1.004, 2.02) | 0.61 (0.26, 1.42) |
| Q5                            | ref.               | ref.               | ref.               | ref.              | ref.               | ref.               | ref.               | ref.              |
| P <sub>interaction</sub>      | 0.35               |                    | 0.24               |                   | 0.32               |                    | 0.52               |                   |
| <b>Amplitude</b>              |                    |                    |                    |                   |                    |                    |                    |                   |
| Q1                            | 1.2 (0.76, 1.91)   | 1.48 (0.55, 3.93)  | 1.17 (0.65, 2.09)  | 2.05 (0.81, 5.21) | 4.01 (2.21, 7.28)  | 1.21 (0.17, 8.68)  | 1.72 (1.08, 2.73)  | 1.99 (0.71, 5.54) |
| Q2                            | 1.34 (0.95, 1.88)  | 1.9 (0.6, 5.97)    | 0.94 (0.6, 1.46)   | 1.64 (0.6, 4.46)  | 2.28 (1.14, 4.53)  | 0.63 (0.1, 4.14)   | 1.16 (0.75, 1.8)   | 2.5 (0.97, 6.45)  |
| Q3                            | 1.1 (0.71, 1.7)    | 0.93 (0.38, 2.31)  | 0.9 (0.58, 1.4)    | 1.65 (0.57, 4.76) | 1.4 (0.51, 3.83)   | 0.15 (0.02, 1.37)  | 1.19 (0.7, 2.02)   | 1.16 (0.35, 3.85) |
| Q4                            | 0.92 (0.51, 1.65)  | 0.82 (0.26, 2.57)  | 0.78 (0.42, 1.45)  | 0.8 (0.32, 1.98)  | 3.88 (1.88, 7.98)  | 0.06 (0.004, 0.87) | 1.21 (0.76, 1.95)  | 0.93 (0.33, 2.64) |
| Q5                            | ref.               | ref.               | ref.               | ref.              | ref.               | ref.               | ref.               | ref.              |
| P <sub>interaction</sub>      | 0.30               |                    | 0.19               |                   | 0.68               |                    | 0.26               |                   |
| <b>Mesor</b>                  |                    |                    |                    |                   |                    |                    |                    |                   |
| Q1                            | 1.42 (0.85, 2.39)  | 0.99 (0.36, 2.71)  | 1.17 (0.74, 1.85)  | 1.32 (0.52, 3.37) | 1.53 (0.82, 2.84)  | 1.46 (0.25, 8.44)  | 1.47 (0.91, 2.37)  | 1.12 (0.49, 2.59) |
| Q2                            | 0.96 (0.51, 1.81)  | 1.44 (0.6, 3.5)    | 0.71 (0.41, 1.26)  | 1.27 (0.61, 2.64) | 0.65 (0.26, 1.65)  | 0.75 (0.08, 6.79)  | 0.91 (0.61, 1.36)  | 0.96 (0.38, 2.43) |
| Q3                            | 1.28 (0.85, 1.93)  | 1.8 (0.79, 4.11)   | 1.24 (0.77, 1.99)  | 1.36 (0.71, 2.63) | 0.76 (0.39, 1.48)  | 0.11 (0.01, 0.84)  | 1.15 (0.72, 1.83)  | 1.21 (0.55, 2.69) |
| Q4                            | 1.05 (0.7, 1.57)   | 1.4 (0.54, 3.67)   | 1.11 (0.68, 1.81)  | 1.11 (0.49, 2.47) | 0.44 (0.18, 1.09)  | 0.77 (0.14, 4.14)  | 0.92 (0.57, 1.51)  | 0.92 (0.5, 1.68)  |
| Q5                            | ref.               | ref.               | ref.               | ref.              | ref.               | ref.               | ref.               | ref.              |
| P <sub>interaction</sub>      | 0.70               |                    | 0.67               |                   | 0.52               |                    | 0.36               |                   |
| <b>Amplitude:Mesor</b>        |                    |                    |                    |                   |                    |                    |                    |                   |
| Q1                            | 1.2 (0.72, 2.01)   | 2.49 (0.995, 6.24) | 1.38 (0.86, 2.23)  | 2.64 (1.13, 6.18) | 2.6 (1.03, 6.59)   | 1.75 (0.31, 9.95)  | 1.43 (0.81, 2.54)  | 2.8 (1.17, 6.7)   |
| Q2                            | 1.17 (0.76, 1.78)  | 1.2 (0.42, 3.38)   | 0.93 (0.57, 1.52)  | 0.96 (0.32, 2.94) | 3.08 (1.61, 5.88)  | 0.07 (0.01, 1)     | 0.81 (0.49, 1.32)  | 1.24 (0.48, 3.2)  |
| Q3                            | 1.04 (0.64, 1.69)  | 0.84 (0.37, 1.93)  | 0.75 (0.48, 1.18)  | 1.2 (0.49, 2.91)  | 1.92 (0.75, 4.91)  | 0.2 (0.03, 1.36)   | 1.03 (0.66, 1.62)  | 0.93 (0.31, 2.76) |
| Q4                            | 1 (0.62, 1.62)     | 1.11 (0.31, 4)     | 1.07 (0.69, 1.66)  | 0.67 (0.23, 1.96) | 2.47 (0.85, 7.17)  | 0 (0, 0)           | 0.95 (0.55, 1.66)  | 0.96 (0.3, 3.02)  |
| Q5                            | ref.               | ref.               | ref.               | ref.              | ref.               | ref.               | ref.               | ref.              |
| P <sub>interaction</sub>      | 0.18               |                    | 0.17               |                   | 0.84               |                    | 0.10               |                   |
| <b>Acrophase</b>              |                    |                    |                    |                   |                    |                    |                    |                   |
| Q1                            | ref.               | ref.               | ref.               | ref.              | ref.               | ref.               | ref.               | ref.              |
| Q2                            | 0.94 (0.57, 1.55)  | 1.31 (0.43, 3.96)  | 1.14 (0.64, 2.02)  | 0.7 (0.25, 1.92)  | 1.06 (0.51, 2.19)  | 1.35 (0.32, 5.68)  | 1.11 (0.66, 1.87)  | 0.61 (0.3, 1.23)  |
| Q3                            | 0.81 (0.48, 1.36)  | 1.44 (0.53, 3.88)  | 0.92 (0.5, 1.71)   | 0.97 (0.32, 3)    | 0.6 (0.25, 1.44)   | 1.04 (0.11, 9.63)  | 0.92 (0.55, 1.53)  | 0.95 (0.4, 2.23)  |
| Q4                            | 0.91 (0.57, 1.45)  | 1.13 (0.4, 3.21)   | 1.2 (0.75, 1.94)   | 0.53 (0.19, 1.49) | 0.78 (0.38, 1.63)  | 0 (0, 0)           | 0.97 (0.6, 1.55)   | 0.75 (0.34, 1.68) |
| Q5                            | 0.87 (0.51, 1.47)  | 1.33 (0.59, 3.01)  | 1.11 (0.67, 1.85)  | 1 (0.34, 2.94)    | 1.01 (0.63, 1.62)  | 0.75 (0.14, 4.13)  | 1.19 (0.75, 1.91)  | 1.27 (0.57, 2.79) |
| P <sub>interaction</sub>      | 0.45               |                    | 0.66               |                   | 0.59               |                    | 0.51               |                   |
| <b>Interdaily stability</b>   |                    |                    |                    |                   |                    |                    |                    |                   |
| Q1                            | 0.83 (0.49, 1.4)   | 1.17 (0.47, 2.94)  | 1.29 (0.77, 2.16)  | 1.71 (0.63, 4.65) | 2.5 (1.44, 4.34)   | 4.8 (1.02, 22.67)  | 2 (1.19, 3.36)     | 1.58 (0.7, 3.57)  |
| Q2                            | 0.95 (0.52, 1.74)  | 1.27 (0.42, 3.84)  | 1.27 (0.69, 2.33)  | 1.33 (0.67, 2.65) | 1.17 (0.58, 2.35)  | 1.59 (0.16, 15.32) | 1.36 (0.88, 2.11)  | 2.04 (0.89, 4.71) |
| Q3                            | 0.9 (0.56, 1.47)   | 0.86 (0.3, 2.47)   | 1.04 (0.62, 1.74)  | 0.84 (0.3, 2.4)   | 1.16 (0.66, 2.05)  | 1.5 (0.22, 10)     | 1.17 (0.8, 1.7)    | 1.31 (0.7, 2.45)  |
| Q4                            | 0.8 (0.53, 1.21)   | 0.55 (0.2, 1.54)   | 0.8 (0.5, 1.26)    | 0.79 (0.28, 2.24) | 1.41 (0.6, 3.34)   | 0.14 (0.01, 1.81)  | 1.07 (0.69, 1.65)  | 0.91 (0.43, 1.94) |
| Q5                            | ref.               | ref.               | ref.               | ref.              | ref.               | ref.               | ref.               | ref.              |
| P <sub>interaction</sub>      | 0.20               |                    | 0.88               |                   | 0.30               |                    | 0.69               |                   |
| <b>Intradaily variability</b> |                    |                    |                    |                   |                    |                    |                    |                   |
| Q1                            | ref.               | ref.               | ref.               | ref.              | ref.               | ref.               | ref.               | ref.              |
| Q2                            | 1.03 (0.63, 1.7)   | 0.82 (0.36, 1.85)  | 0.76 (0.4, 1.46)   | 1.15 (0.58, 2.29) | 0.8 (0.38, 1.69)   | 0.74 (0.1, 5.32)   | 1.25 (0.81, 1.92)  | 0.69 (0.34, 1.43) |
| Q3                            | 1.07 (0.69, 1.65)  | 1.38 (0.49, 3.92)  | 0.9 (0.54, 1.49)   | 1.35 (0.43, 4.19) | 1.24 (0.51, 3)     | 0.57 (0.17, 1.94)  | 1.28 (0.82, 1.99)  | 0.72 (0.3, 1.74)  |
| Q4                            | 1.23 (0.78, 1.93)  | 1.95 (0.7, 5.45)   | 0.83 (0.49, 1.38)  | 1.53 (0.53, 4.49) | 0.56 (0.28, 1.13)  | 1.59 (0.28, 8.85)  | 1.3 (0.81, 2.08)   | 1.81 (0.95, 3.45) |

|                          |                   |                   |                   |                   |                   |                   |                   |                   |
|--------------------------|-------------------|-------------------|-------------------|-------------------|-------------------|-------------------|-------------------|-------------------|
| Q5                       | 0.92 (0.62, 1.35) | 1.54 (0.54, 4.43) | 1.29 (0.74, 2.23) | 1.29 (0.52, 3.18) | 2.33 (1.22, 4.46) | 2.9 (0.55, 15.17) | 1.56 (1.03, 2.36) | 1.37 (0.47, 3.98) |
| P <sub>interaction</sub> | 0.42              |                   | 0.90              |                   | 0.62              |                   | 0.86              |                   |

Abnormal levels defined as >47 IU/L in men or >30 IU/L in women for ALT, >33 IU/L in men and women for AST, >113 IU/L in men and women for ALP and >65 IU/L in men or >36 IU/L in women for GGT

Model adjusted for age, gender, race and ethnicity, education, household income, marital status, smoking, alcohol, hepatitis B, hepatitis C and hepatitis E.

Light drinker were classified as having average daily drinking volume of me <1 for men and <0.5 for women; moderate drinker as 1 to 2 for men and 0.5 to 1 for women; heavy drinker as ≥2 for men and ≥1 for women.

Abbreviations: NHANES, National Health and Nutrition Examination Survey; ALT, alanine aminotransferase; AST, aspartate aminotransferase; ALP, alkaline phosphatase; GGT, gamma glutamyl transaminase

**Table S7. Associations (OR and 95% CI) between quintiles of rest-activity rhythm characteristics and abnormal levels of ALT, AST, ALP and GGT, stratified by BMI, NHANES 2011 – 2014**

|                               | ALT<br><25        | 25-30             | >=30              | AST<br><25        | 25-30             | >=30              | ALP<br><25          | 25-30              | >=30               | GGT<br><25        | 25-30             | >=30              |
|-------------------------------|-------------------|-------------------|-------------------|-------------------|-------------------|-------------------|---------------------|--------------------|--------------------|-------------------|-------------------|-------------------|
| <b>F statistic</b>            |                   |                   |                   |                   |                   |                   |                     |                    |                    |                   |                   |                   |
| Q1                            | 2.04 (0.79, 5.29) | 0.96 (0.34, 2.72) | 0.87 (0.47, 1.61) | 2.04 (0.67, 6.2)  | 1 (0.49, 2.01)    | 1.31 (0.76, 2.24) | 12.37 (1.95, 78.61) | 1.11 (0.4, 3.06)   | 1.96 (0.85, 4.52)  | 1.61 (0.57, 4.57) | 1.59 (0.92, 2.77) | 1.54 (0.77, 3.08) |
| Q2                            | 0.96 (0.4, 2.26)  | 1.02 (0.44, 2.38) | 1.59 (0.91, 2.78) | 1.33 (0.54, 3.27) | 0.88 (0.49, 1.57) | 1.45 (0.85, 2.48) | 5.69 (1.35, 23.98)  | 0.3 (0.11, 0.83)   | 1.6 (0.5, 5.08)    | 1.29 (0.59, 2.86) | 0.96 (0.45, 2.02) | 1.93 (0.97, 3.83) |
| Q3                            | 1.56 (0.71, 3.45) | 1.23 (0.67, 2.27) | 0.75 (0.43, 1.31) | 1.08 (0.42, 2.81) | 0.7 (0.39, 1.24)  | 0.77 (0.44, 1.34) | 2.84 (0.8, 10.11)   | 0.98 (0.46, 2.08)  | 0.39 (0.13, 1.17)  | 0.96 (0.46, 2.03) | 1.15 (0.61, 2.15) | 0.84 (0.48, 1.49) |
| Q4                            | 0.69 (0.23, 2.05) | 0.59 (0.26, 1.3)  | 0.9 (0.5, 1.61)   | 0.67 (0.23, 1.95) | 0.8 (0.39, 1.64)  | 0.88 (0.46, 1.68) | 1.29 (0.27, 6.14)   | 0.21 (0.05, 0.82)  | 0.23 (0.06, 0.84)  | 0.96 (0.31, 2.97) | 0.83 (0.33, 2.09) | 1.14 (0.7, 1.84)  |
| Q5                            | ref.                | ref.               | ref.               | ref.              | ref.              | ref.              |
| P interaction                 | 0.59              |                   |                   | 0.70              |                   |                   | 0.65                |                    |                    | 0.74              |                   |                   |
| <b>Amplitude</b>              |                   |                   |                   |                   |                   |                   |                     |                    |                    |                   |                   |                   |
| Q1                            | 1.14 (0.39, 3.32) | 1.31 (0.64, 2.69) | 0.95 (0.56, 1.59) | 1.27 (0.5, 3.26)  | 1.01 (0.5, 2.04)  | 1.24 (0.58, 2.66) | 1.6 (0.28, 9.08)    | 3.06 (0.48, 19.35) | 1.89 (0.98, 3.63)  | 1.34 (0.47, 3.8)  | 0.9 (0.46, 1.76)  | 1.79 (0.99, 3.22) |
| Q2                            | 1.45 (0.58, 3.62) | 1.69 (0.77, 3.69) | 1.14 (0.76, 1.72) | 0.9 (0.38, 2.13)  | 1.62 (0.77, 3.38) | 0.84 (0.44, 1.62) | 0.43 (0.06, 2.97)   | 4.82 (0.99, 23.41) | 0.64 (0.21, 1.98)  | 1.47 (0.51, 4.24) | 1.11 (0.57, 2.13) | 1.27 (0.68, 2.39) |
| Q3                            | 0.79 (0.33, 1.92) | 1.18 (0.58, 2.4)  | 0.87 (0.46, 1.65) | 0.8 (0.3, 2.12)   | 1.6 (0.82, 3.14)  | 0.74 (0.36, 1.5)  | 0.25 (0.05, 1.29)   | 1.18 (0.22, 6.43)  | 0.6 (0.2, 1.78)    | 1.21 (0.42, 3.51) | 0.73 (0.32, 1.68) | 1.27 (0.71, 2.25) |
| Q4                            | 0.75 (0.29, 1.93) | 1.06 (0.5, 2.22)  | 0.72 (0.36, 1.43) | 0.66 (0.29, 1.49) | 1.24 (0.58, 2.67) | 0.49 (0.21, 1.17) | 0.64 (0.07, 6.25)   | 4.38 (0.97, 19.72) | 1.38 (0.52, 3.63)  | 1.64 (0.6, 4.47)  | 0.67 (0.29, 1.54) | 1.13 (0.58, 2.21) |
| Q5                            | ref.                | ref.               | ref.               | ref.              | ref.              | ref.              |
| P interaction                 | 0.27              |                   |                   | 0.72              |                   |                   | 0.94                |                    |                    | 0.53              |                   |                   |
| <b>Mesor</b>                  |                   |                   |                   |                   |                   |                   |                     |                    |                    |                   |                   |                   |
| Q1                            | 1.35 (0.5, 3.61)  | 1.62 (0.82, 3.22) | 0.96 (0.57, 1.6)  | 1.1 (0.47, 2.55)  | 1.4 (0.77, 2.52)  | 1.01 (0.65, 1.58) | 9.95 (1.84, 53.63)  | 1.05 (0.35, 3.18)  | 1.07 (0.51, 2.22)  | 0.71 (0.32, 1.55) | 1.21 (0.56, 2.62) | 0.98 (0.52, 1.84) |
| Q2                            | 1.11 (0.38, 3.25) | 0.82 (0.34, 2)    | 1.04 (0.61, 1.75) | 1 (0.5, 1.99)     | 0.71 (0.33, 1.54) | 0.85 (0.42, 1.71) | 5.39 (0.63, 46.4)   | 0.32 (0.08, 1.29)  | 0.45 (0.18, 1.15)  | 0.87 (0.32, 2.35) | 0.48 (0.22, 1.04) | 0.83 (0.48, 1.45) |
| Q3                            | 0.99 (0.38, 2.56) | 1.85 (0.95, 3.6)  | 1.13 (0.67, 1.92) | 0.92 (0.32, 2.65) | 1.57 (0.83, 2.96) | 1.17 (0.54, 2.5)  | 2.84 (0.44, 18.29)  | 0.83 (0.24, 2.8)   | 0.37 (0.17, 0.79)  | 0.71 (0.22, 2.22) | 1.21 (0.57, 2.59) | 1.03 (0.58, 1.84) |
| Q4                            | 1.06 (0.32, 3.46) | 1.35 (0.72, 2.56) | 0.88 (0.5, 1.56)  | 1.17 (0.54, 2.54) | 1.23 (0.58, 2.58) | 1.02 (0.5, 2.1)   | 2.49 (0.43, 14.5)   | 0.71 (0.2, 2.55)   | 0.31 (0.12, 0.84)  | 0.88 (0.28, 2.79) | 0.84 (0.41, 1.74) | 0.87 (0.55, 1.37) |
| Q5                            | ref.                | ref.               | ref.               | ref.              | ref.              | ref.              |
| P interaction                 | 0.57              |                   |                   | 0.64              |                   |                   | 0.36                |                    |                    | 0.63              |                   |                   |
| <b>Amplitude:Mesor</b>        |                   |                   |                   |                   |                   |                   |                     |                    |                    |                   |                   |                   |
| Q1                            | 1.46 (0.55, 3.85) | 1.69 (0.86, 3.34) | 0.92 (0.53, 1.59) | 1.56 (0.73, 3.32) | 1.7 (0.74, 3.89)  | 1.32 (0.68, 2.57) | 1.13 (0.21, 6.06)   | 6.36 (0.85, 47.63) | 1.32 (0.51, 3.44)  | 1.28 (0.48, 3.42) | 1.52 (0.73, 3.15) | 1.66 (0.82, 3.38) |
| Q2                            | 0.87 (0.32, 2.31) | 1.18 (0.57, 2.46) | 0.92 (0.53, 1.59) | 0.68 (0.31, 1.5)  | 1.24 (0.59, 2.61) | 0.78 (0.39, 1.58) | 0.54 (0.09, 3.31)   | 6.72 (0.93, 48.67) | 1.18 (0.42, 3.27)  | 1.03 (0.36, 3.01) | 0.65 (0.3, 1.4)   | 0.98 (0.52, 1.86) |
| Q3                            | 1.07 (0.5, 2.32)  | 0.92 (0.42, 2.04) | 0.92 (0.53, 1.59) | 0.82 (0.42, 1.61) | 0.99 (0.41, 2.4)  | 0.78 (0.38, 1.61) | 0.34 (0.05, 2.19)   | 2.91 (0.4, 21.23)  | 1.06 (0.41, 2.72)  | 1.43 (0.55, 3.71) | 0.7 (0.33, 1.47)  | 1.04 (0.57, 1.89) |
| Q4                            | 0.84 (0.3, 2.36)  | 1.36 (0.62, 2.98) | 0.92 (0.53, 1.59) | 0.67 (0.24, 1.91) | 1.71 (0.87, 3.33) | 0.67 (0.37, 1.19) | 0.48 (0.05, 4.91)   | 4.04 (0.51, 31.97) | 1.23 (0.34, 4.48)  | 0.75 (0.22, 2.54) | 1.11 (0.57, 2.14) | 0.84 (0.39, 1.84) |
| Q5                            | ref.                | ref.               | ref.               | ref.              | ref.              | ref.              |
| P interaction                 | 0.47              |                   |                   | 0.63              |                   |                   | 0.62                |                    |                    | 0.66              |                   |                   |
| <b>Acrophase</b>              |                   |                   |                   |                   |                   |                   |                     |                    |                    |                   |                   |                   |
| Q1                            | ref.                | ref.               | ref.               | ref.              | ref.              | ref.              |
| Q2                            | 0.48 (0.21, 1.13) | 0.82 (0.38, 1.78) | 1.48 (0.9, 2.45)  | 0.56 (0.25, 1.25) | 0.74 (0.31, 1.78) | 1.67 (0.97, 2.89) | 0.28 (0.08, 1)      | 1.08 (0.41, 2.79)  | 1.56 (0.56, 4.36)  | 0.69 (0.28, 1.7)  | 0.59 (0.3, 1.17)  | 1.45 (0.89, 2.35) |
| Q3                            | 0.36 (0.15, 0.87) | 0.98 (0.49, 1.95) | 1.34 (0.67, 2.65) | 0.27 (0.12, 0.6)  | 0.86 (0.39, 1.92) | 2 (1.04, 3.85)    | 0.88 (0.23, 3.36)   | 0.29 (0.09, 0.97)  | 1.05 (0.33, 3.29)  | 0.75 (0.33, 1.69) | 1.19 (0.52, 2.69) | 0.87 (0.5, 1.49)  |
| Q4                            | 0.63 (0.28, 1.43) | 0.93 (0.49, 1.8)  | 1.45 (0.81, 2.62) | 0.44 (0.18, 1.1)  | 0.98 (0.47, 2.02) | 1.8 (0.86, 3.79)  | 0.86 (0.23, 3.21)   | 0.49 (0.15, 1.66)  | 0.69 (0.3, 1.62)   | 0.55 (0.2, 1.49)  | 0.51 (0.2, 1.33)  | 1.37 (0.87, 2.16) |
| Q5                            | 0.69 (0.23, 2.12) | 0.85 (0.36, 2)    | 1.2 (0.67, 2.15)  | 0.71 (0.28, 1.82) | 0.93 (0.47, 1.84) | 1.68 (0.84, 3.36) | 0.65 (0.25, 1.67)   | 0.6 (0.27, 1.36)   | 1.34 (0.54, 3.28)  | 0.51 (0.22, 1.19) | 1.41 (0.67, 2.95) | 1.49 (0.96, 2.3)  |
| P interaction                 | 0.31              |                   |                   | 0.15              |                   |                   | 0.44                |                    |                    | 0.04              |                   |                   |
| <b>Interdaily stability</b>   |                   |                   |                   |                   |                   |                   |                     |                    |                    |                   |                   |                   |
| Q1                            | 1.2 (0.41, 3.57)  | 0.8 (0.33, 1.97)  | 0.79 (0.4, 1.57)  | 2.98 (0.99, 8.96) | 0.9 (0.41, 1.94)  | 1.33 (0.71, 2.5)  | 10.38 (1.8, 59.99)  | 1.25 (0.38, 4.11)  | 4.64 (1.57, 13.72) | 0.83 (0.4, 1.73)  | 1.6 (0.84, 3.06)  | 1.71 (0.86, 3.41) |
| Q2                            | 1.34 (0.55, 3.27) | 0.85 (0.39, 1.88) | 1 (0.51, 1.97)    | 1.77 (0.78, 4.05) | 0.92 (0.49, 1.74) | 1.28 (0.64, 2.54) | 7.52 (0.86, 66.07)  | 0.25 (0.09, 0.66)  | 2.52 (0.65, 9.84)  | 1.08 (0.43, 2.73) | 1.3 (0.56, 3.04)  | 1.34 (0.78, 2.29) |
| Q3                            | 0.51 (0.19, 1.32) | 0.75 (0.35, 1.62) | 1.02 (0.62, 1.67) | 1.47 (0.49, 4.42) | 0.71 (0.36, 1.41) | 0.96 (0.51, 1.82) | 5.71 (1.18, 27.66)  | 0.44 (0.17, 1.12)  | 1.86 (0.53, 6.57)  | 1 (0.41, 2.43)    | 0.8 (0.4, 1.59)   | 1.18 (0.7, 1.97)  |
| Q4                            | 0.72 (0.26, 2.01) | 0.65 (0.33, 1.29) | 0.84 (0.51, 1.38) | 0.84 (0.33, 2.15) | 0.64 (0.32, 1.28) | 0.99 (0.64, 1.53) | 1.39 (0.24, 7.9)    | 0.49 (0.15, 1.55)  | 2.55 (0.74, 8.78)  | 0.32 (0.12, 0.9)  | 0.98 (0.54, 1.76) | 1.25 (0.66, 2.34) |
| Q5                            | ref.                | ref.               | ref.               | ref.              | ref.              | ref.              |
| P interaction                 | 0.94              |                   |                   | 0.28              |                   |                   | 0.61                |                    |                    | 0.68              |                   |                   |
| <b>Intradaily variability</b> |                   |                   |                   |                   |                   |                   |                     |                    |                    |                   |                   |                   |
| Q1                            | ref.                | ref.               | ref.               | ref.              | ref.              | ref.              |
| Q2                            | 0.97 (0.32, 2.99) | 1.53 (0.66, 3.55) | 0.68 (0.38, 1.22) | 0.74 (0.33, 1.67) | 1.04 (0.46, 2.33) | 0.57 (0.28, 1.16) | 0.38 (0.12, 1.26)   | 0.72 (0.2, 2.55)   | 1.05 (0.33, 3.27)  | 1.28 (0.51, 3.23) | 1.22 (0.52, 2.86) | 0.64 (0.4, 1.05)  |
| Q3                            | 1.66 (0.69, 3.98) | 1.3 (0.62, 2.75)  | 0.99 (0.55, 1.79) | 0.85 (0.36, 2.01) | 0.94 (0.48, 1.82) | 1.04 (0.57, 1.91) | 0.83 (0.22, 3.2)    | 0.74 (0.18, 3.08)  | 1.21 (0.64, 2.28)  | 1.12 (0.62, 2.02) | 0.83 (0.41, 1.67) | 1.05 (0.6, 1.84)  |
| Q4                            | 2.16 (0.91, 5.11) | 1.53 (0.77, 3.06) | 0.97 (0.55, 1.71) | 1.23 (0.55, 2.73) | 0.93 (0.5, 1.73)  | 0.74 (0.37, 1.47) | 2.16 (0.44, 10.53)  | 0.4 (0.13, 1.31)   | 0.66 (0.21, 2.09)  | 1.55 (0.8, 3)     | 1.15 (0.54, 2.44) | 1.06 (0.6, 1.89)  |

|                          |                   |                   |                   |                |                  |                   |                 |                   |                   |                   |                |                   |
|--------------------------|-------------------|-------------------|-------------------|----------------|------------------|-------------------|-----------------|-------------------|-------------------|-------------------|----------------|-------------------|
| Q5                       | 1.51 (0.51, 4.43) | 1.38 (0.63, 3.04) | 0.68 (0.38, 1.23) | 2 (0.89, 4.52) | 1.11 (0.6, 2.06) | 0.85 (0.41, 1.76) | 4.13 (1, 17.05) | 1.34 (0.44, 4.05) | 2.82 (1.13, 7.03) | 0.84 (0.36, 1.95) | 1 (0.52, 1.94) | 1.24 (0.65, 2.37) |
| P <sub>interaction</sub> | 0.06              |                   |                   | 0.01           |                  |                   | 0.63            |                   |                   | 0.34              |                |                   |

Abnormal levels defined as >47 IU/L in men or >30 IU/L in women for ALT, >33 IU/L in men and women for AST, >113 IU/L in men and women for ALP and >65 IU/L in men or >36 IU/L in women for GGT

Model adjusted for age, gender, race and ethnicity, education, household income, marital status, smoking, alcohol, hepatitis B, hepatitis C and hepatitis E.

Abbreviations: NHANES, National Health and Nutrition Examination Survey; ALT, alanine aminotransferase; AST, aspartate aminotransferase; ALP, alkaline phosphatase; GGT, gamma glutamyl transaminase

**Table S8. Associations (OR and 95% CI) between rest-activity rhythm characteristics quintiles and abnormal levels of ALT, AST, ALP and GGT, stratified by diabetes status, NHANES 2011 – 2014**

|                               | ALT               |                   | AST               |                   | ALP                |                   | GGT               |                   |
|-------------------------------|-------------------|-------------------|-------------------|-------------------|--------------------|-------------------|-------------------|-------------------|
|                               | With diabetes     | Without diabetes  | With diabetes     | Without diabetes  | With diabetes      | Without diabetes  | With diabetes     | Without diabetes  |
| <b>F statistic</b>            |                   |                   |                   |                   |                    |                   |                   |                   |
| Q1                            | 0.68 (0.3, 1.57)  | 1.11 (0.65, 1.88) | 2.01 (0.95, 4.29) | 1.07 (0.68, 1.67) | 1.72 (0.54, 5.49)  | 2.32 (1.15, 4.68) | 2.93 (1.39, 6.17) | 1.43 (0.86, 2.37) |
| Q2                            | 0.97 (0.38, 2.51) | 1.32 (0.79, 2.21) | 1.63 (0.73, 3.63) | 1.02 (0.69, 1.52) | 1.71 (0.4, 7.32)   | 1.02 (0.41, 2.55) | 2.11 (1.09, 4.11) | 1.52 (0.91, 2.51) |
| Q3                            | 0.73 (0.22, 2.46) | 1.08 (0.72, 1.62) | 1.21 (0.52, 2.81) | 0.68 (0.43, 1.08) | 0.62 (0.2, 1.95)   | 0.99 (0.49, 2.01) | 2.03 (0.8, 5.12)  | 0.9 (0.58, 1.39)  |
| Q4                            | 0.45 (0.19, 1.09) | 0.82 (0.5, 1.35)  | 0.72 (0.3, 1.77)  | 0.84 (0.56, 1.26) | 0.32 (0.04, 2.32)  | 0.36 (0.14, 0.9)  | 1.52 (0.68, 3.39) | 0.96 (0.64, 1.46) |
| Q5                            | ref.              | ref.              | ref.              | ref.              | ref.               | ref.              | ref.              | ref.              |
| P <sub>interaction</sub>      | 0.50              |                   | 0.18              |                   | 0.70               |                   | 0.26              |                   |
| <b>Amplitude</b>              |                   |                   |                   |                   |                    |                   |                   |                   |
| Q1                            | 1.13 (0.36, 3.54) | 0.98 (0.62, 1.54) | 2.43 (0.77, 7.7)  | 0.89 (0.53, 1.48) | 2.59 (1.02, 6.53)  | 2.24 (1, 5.02)    | 1.94 (1.05, 3.58) | 1.25 (0.79, 1.99) |
| Q2                            | 1.14 (0.39, 3.34) | 1.3 (0.79, 2.15)  | 1.87 (0.73, 4.81) | 0.88 (0.55, 1.39) | 1.21 (0.29, 5.11)  | 1.39 (0.57, 3.37) | 1.13 (0.56, 2.28) | 1.34 (0.89, 2.01) |
| Q3                            | 0.78 (0.2, 3.08)  | 0.96 (0.65, 1.41) | 1.63 (0.44, 5.96) | 0.9 (0.59, 1.37)  | 1.04 (0.35, 3.05)  | 0.54 (0.2, 1.48)  | 0.79 (0.29, 2.17) | 1.14 (0.69, 1.89) |
| Q4                            | 0.63 (0.15, 2.76) | 0.87 (0.48, 1.56) | 0.69 (0.13, 3.63) | 0.76 (0.45, 1.29) | 3.1 (1.09, 8.83)   | 1.55 (0.69, 3.5)  | 0.79 (0.31, 2.02) | 1.11 (0.66, 1.88) |
| Q5                            | ref.              | ref.              | ref.              | ref.              | ref.               | ref.              | ref.              | ref.              |
| P <sub>interaction</sub>      | 0.73              |                   | 0.01              |                   | 0.56               |                   | 0.21              |                   |
| <b>Mesor</b>                  |                   |                   |                   |                   |                    |                   |                   |                   |
| Q1                            | 2.03 (0.89, 4.64) | 1.05 (0.65, 1.68) | 1.2 (0.55, 2.61)  | 1.04 (0.65, 1.69) | 3.49 (1.22, 9.99)  | 0.94 (0.45, 1.96) | 0.99 (0.38, 2.57) | 1.01 (0.58, 1.73) |
| Q2                            | 1.13 (0.43, 2.96) | 1.01 (0.67, 1.52) | 0.59 (0.21, 1.65) | 0.89 (0.52, 1.52) | 1.25 (0.35, 4.44)  | 0.42 (0.17, 1)    | 0.44 (0.18, 1.05) | 0.85 (0.56, 1.3)  |
| Q3                            | 2.55 (1.14, 5.74) | 1.13 (0.81, 1.58) | 1.57 (0.51, 4.85) | 1.12 (0.77, 1.64) | 0.8 (0.22, 2.91)   | 0.58 (0.27, 1.25) | 0.94 (0.46, 1.92) | 1.05 (0.7, 1.57)  |
| Q4                            | 1.94 (0.8, 4.68)  | 0.94 (0.63, 1.38) | 1.53 (0.6, 3.93)  | 1.04 (0.6, 1.78)  | 0.64 (0.16, 2.54)  | 0.48 (0.2, 1.17)  | 0.59 (0.25, 1.39) | 0.94 (0.59, 1.49) |
| Q5                            | ref.              | ref.              | ref.              | ref.              | ref.               | ref.              | ref.              | ref.              |
| P <sub>interaction</sub>      | 0.75              |                   | 0.55              |                   | 0.03               |                   | 0.71              |                   |
| <b>Amplitude:Mesor</b>        |                   |                   |                   |                   |                    |                   |                   |                   |
| Q1                            | 1.12 (0.45, 2.79) | 1.22 (0.77, 1.95) | 2.96 (1.08, 8.13) | 1.11 (0.65, 1.9)  | 1.3 (0.33, 5.18)   | 2.4 (1.01, 5.68)  | 1.45 (0.78, 2.68) | 1.5 (0.94, 2.41)  |
| Q2                            | 1.05 (0.41, 2.65) | 1.07 (0.7, 1.64)  | 1.63 (0.59, 4.55) | 0.78 (0.48, 1.25) | 1.47 (0.58, 3.71)  | 1.87 (0.84, 4.19) | 0.72 (0.36, 1.43) | 0.9 (0.58, 1.41)  |
| Q3                            | 0.92 (0.29, 2.95) | 0.98 (0.63, 1.53) | 1.38 (0.39, 4.92) | 0.77 (0.48, 1.23) | 1.15 (0.34, 3.86)  | 1.2 (0.53, 2.75)  | 0.6 (0.29, 1.24)  | 1.14 (0.74, 1.77) |
| Q4                            | 0.66 (0.2, 2.25)  | 1.03 (0.67, 1.58) | 1.44 (0.49, 4.23) | 0.88 (0.62, 1.26) | 1.86 (0.28, 12.55) | 1.21 (0.43, 3.35) | 0.48 (0.2, 1.2)   | 1.03 (0.64, 1.66) |
| Q5                            | ref.              | ref.              | ref.              | ref.              | ref.               | ref.              | ref.              | ref.              |
| P <sub>interaction</sub>      | 0.69              |                   | 0.01              |                   | 0.05               |                   | 0.40              |                   |
| <b>Acrophase</b>              |                   |                   |                   |                   |                    |                   |                   |                   |
| Q1                            | ref.              | ref.              | ref.              | ref.              | ref.               | ref.              | ref.              | ref.              |
| Q2                            | 1.15 (0.62, 2.12) | 1.04 (0.62, 1.75) | 1.85 (0.83, 4.1)  | 0.83 (0.47, 1.47) | 1.02 (0.34, 3.07)  | 1.13 (0.52, 2.43) | 1.81 (0.92, 3.55) | 0.8 (0.48, 1.35)  |
| Q3                            | 0.73 (0.3, 1.74)  | 0.97 (0.57, 1.64) | 1.54 (0.63, 3.76) | 0.81 (0.51, 1.28) | 1.26 (0.43, 3.65)  | 0.43 (0.17, 1.05) | 1.53 (0.7, 3.35)  | 0.8 (0.49, 1.31)  |
| Q4                            | 1.1 (0.63, 1.9)   | 0.97 (0.59, 1.57) | 1.81 (0.87, 3.75) | 0.82 (0.53, 1.25) | 0.81 (0.36, 1.85)  | 0.62 (0.24, 1.58) | 1.44 (0.8, 2.6)   | 0.74 (0.44, 1.26) |
| Q5                            | 0.51 (0.27, 0.93) | 1.08 (0.61, 1.9)  | 0.76 (0.38, 1.52) | 1.06 (0.64, 1.77) | 1.21 (0.46, 3.2)   | 0.81 (0.47, 1.41) | 1.67 (0.89, 3.15) | 1.1 (0.69, 1.74)  |
| P <sub>interaction</sub>      | 0.66              |                   | 0.99              |                   | 0.13               |                   | 0.01              |                   |
| <b>Interdaily stability</b>   |                   |                   |                   |                   |                    |                   |                   |                   |
| Q1                            | 0.48 (0.21, 1.08) | 0.87 (0.52, 1.46) | 1.31 (0.66, 2.57) | 1.22 (0.77, 1.94) | 5.63 (1.56, 20.37) | 2.03 (1.05, 3.94) | 2.27 (1.09, 4.74) | 1.26 (0.79, 2.04) |
| Q2                            | 0.6 (0.24, 1.51)  | 1.06 (0.59, 1.9)  | 1.59 (0.83, 3.05) | 1.05 (0.64, 1.72) | 2.66 (0.57, 12.49) | 0.87 (0.35, 2.18) | 1.24 (0.7, 2.2)   | 1.28 (0.81, 2.03) |
| Q3                            | 1.1 (0.57, 2.11)  | 0.71 (0.41, 1.23) | 1.42 (0.67, 2.99) | 0.73 (0.44, 1.22) | 4.7 (1.25, 17.66)  | 0.67 (0.29, 1.52) | 1.51 (0.87, 2.62) | 0.9 (0.59, 1.37)  |
| Q4                            | 0.56 (0.24, 1.29) | 0.76 (0.49, 1.17) | 0.74 (0.31, 1.74) | 0.77 (0.49, 1.21) | 3.02 (0.77, 11.86) | 0.8 (0.32, 2.02)  | 0.66 (0.34, 1.3)  | 0.95 (0.6, 1.5)   |
| Q5                            | ref.              | ref.              | ref.              | ref.              | ref.               | ref.              | ref.              | ref.              |
| P <sub>interaction</sub>      | 0.39              |                   | 0.59              |                   | 0.16               |                   | 0.09              |                   |
| <b>Intradaily variability</b> |                   |                   |                   |                   |                    |                   |                   |                   |
| Q1                            | ref.              | ref.              | ref.              | ref.              | ref.               | ref.              | ref.              | ref.              |
| Q2                            | 1.04 (0.4, 2.68)  | 0.84 (0.52, 1.35) | 0.74 (0.23, 2.38) | 0.76 (0.48, 1.19) | 5.84 (1.17, 29.09) | 0.45 (0.2, 1.01)  | 1.52 (0.66, 3.5)  | 0.84 (0.64, 1.08) |
| Q3                            | 1.05 (0.44, 2.48) | 1.07 (0.61, 1.88) | 0.88 (0.38, 2.02) | 0.95 (0.55, 1.65) | 4.59 (0.9, 23.45)  | 0.67 (0.28, 1.6)  | 1.48 (0.67, 3.28) | 0.87 (0.59, 1.28) |
| Q4                            | 1.19 (0.45, 3.13) | 1.19 (0.66, 2.14) | 1.04 (0.41, 2.66) | 0.8 (0.44, 1.46)  | 2.72 (0.7, 10.65)  | 0.52 (0.21, 1.27) | 1.4 (0.7, 2.81)   | 1.15 (0.84, 1.57) |

|                          |                  |                   |                 |                  |                     |                   |                   |                   |
|--------------------------|------------------|-------------------|-----------------|------------------|---------------------|-------------------|-------------------|-------------------|
| Q5                       | 0.76 (0.3, 1.93) | 0.87 (0.55, 1.37) | 1.04 (0.4, 2.7) | 1.08 (0.7, 1.65) | 10.89 (3.81, 31.11) | 1.28 (0.62, 2.64) | 2.56 (1.39, 4.71) | 0.82 (0.54, 1.24) |
| P <sub>interaction</sub> | 0.73             |                   | 0.58            |                  | 0.04                |                   | 0.04              |                   |

Abnormal levels defined as >47 IU/L in men or >30 IU/L in women for ALT, >33 IU/L in men and women for AST, >113 IU/L in men and women for ALP and >65 IU/L in men or >36 IU/L in women for GGT

Model adjusted for age, gender, race and ethnicity, education, household income, marital status, smoking, alcohol, hepatitis B, hepatitis C and hepatitis E.

Abbreviations: NHANES, National Health and Nutrition Examination Survey; ALT, alanine aminotransferase; AST, aspartate aminotransferase; ALP, alkaline phosphatase; GGT, gamma glutamyl transaminase

**Table S9. Associations (OR and 95% CI) between rest-activity rhythm characteristics quintiles and abnormal levels of ALT, AST, ALP, and GGT, stratified by sessions attended, NHANES 2011 – 2014**

|                        | ALT               |                   |                   | AST               |                   |                   | ALP               |                   |                       | GGT               |                   |                    |
|------------------------|-------------------|-------------------|-------------------|-------------------|-------------------|-------------------|-------------------|-------------------|-----------------------|-------------------|-------------------|--------------------|
|                        | Morning           | Afternoon         | Evening           | Morning           | Afternoon         | Evening           | Morning           | Afternoon         | Evening               | Morning           | Afternoon         | Evening            |
| <b>F statistic</b>     |                   |                   |                   |                   |                   |                   |                   |                   |                       |                   |                   |                    |
| Q1                     | 1.36 (0.75, 2.47) | 0.99 (0.48, 2.06) | 0.78 (0.25, 2.47) | 1.51 (0.81, 2.79) | 1.45 (0.75, 2.82) | 0.56 (0.2, 1.6)   | 2.15 (0.87, 5.28) | 2.11 (0.98, 4.52) | 4.03 (0.29, 56.67)    | 2.29 (1.34, 3.94) | 1.64 (0.92, 2.94) | 1.09 (0.25, 4.82)  |
| Q2                     | 1.73 (0.93, 3.19) | 1.05 (0.56, 1.96) | 0.98 (0.39, 2.49) | 1.44 (0.76, 2.74) | 1.07 (0.63, 1.82) | 0.81 (0.36, 1.81) | 1.69 (0.6, 4.8)   | 0.96 (0.38, 2.4)  | 1.16 (0.08, 16.99)    | 2.51 (1.38, 4.59) | 0.86 (0.46, 1.62) | 2.31 (0.52, 10.15) |
| Q3                     | 0.89 (0.58, 1.35) | 1.43 (0.78, 2.63) | 1 (0.37, 2.69)    | 0.68 (0.36, 1.29) | 1.09 (0.59, 2)    | 0.59 (0.25, 1.39) | 0.83 (0.32, 2.14) | 0.79 (0.34, 1.81) | 1.89 (0.12, 28.65)    | 1.28 (0.73, 2.24) | 0.95 (0.54, 1.69) | 1.34 (0.31, 5.72)  |
| Q4                     | 0.64 (0.31, 1.31) | 1.27 (0.65, 2.48) | 0.39 (0.16, 1)    | 1.09 (0.44, 2.69) | 0.92 (0.51, 1.66) | 0.32 (0.11, 0.94) | 0.37 (0.13, 1.07) | 0.39 (0.12, 1.23) | 0 (0, 0)              | 1.56 (0.86, 2.81) | 0.69 (0.37, 1.28) | 1.42 (0.47, 4.27)  |
| Q5                     | ref.                  | ref.              | ref.              | ref.               |
| P interaction          | 0.16              |                   |                   | 0.32              |                   |                   | 0.24              |                   |                       | 0.52              |                   |                    |
| <b>Amplitude</b>       |                   |                   |                   |                   |                   |                   |                   |                   |                       |                   |                   |                    |
| Q1                     | 1.36 (0.75, 2.49) | 0.62 (0.33, 1.2)  | 2.65 (1, 7)       | 1.45 (0.82, 2.58) | 0.94 (0.4, 2.18)  | 0.82 (0.37, 1.81) | 2.12 (0.78, 5.75) | 2.96 (0.92, 9.5)  | 3.13 (0.13, 77.53)    | 1.54 (0.85, 2.79) | 1.86 (0.97, 3.57) | 1.06 (0.32, 3.53)  |
| Q2                     | 1.2 (0.67, 2.15)  | 1.25 (0.67, 2.35) | 3.28 (1.42, 7.61) | 1.21 (0.72, 2.02) | 0.89 (0.42, 1.92) | 1.15 (0.36, 3.62) | 1.3 (0.49, 3.44)  | 1.31 (0.34, 4.97) | 8.15 (0.14, 485.77)   | 1.13 (0.62, 2.09) | 1.57 (0.85, 2.89) | 2.27 (0.79, 6.55)  |
| Q3                     | 0.96 (0.45, 2.05) | 0.78 (0.45, 1.36) | 2.05 (0.82, 5.13) | 0.94 (0.53, 1.67) | 1.12 (0.58, 2.18) | 0.71 (0.28, 1.76) | 0.69 (0.23, 2.11) | 0.62 (0.14, 2.77) | 4.64 (0.11, 202.84)   | 0.95 (0.56, 1.61) | 1.52 (0.8, 2.88)  | 0.88 (0.22, 3.48)  |
| Q4                     | 0.75 (0.35, 1.64) | 0.7 (0.37, 1.32)  | 2.14 (0.67, 6.87) | 0.76 (0.34, 1.68) | 0.6 (0.3, 1.21)   | 1.12 (0.42, 3)    | 1.87 (0.72, 4.86) | 1.53 (0.35, 6.62) | 17.31 (0.26, 1154.48) | 1.04 (0.57, 1.88) | 0.84 (0.45, 1.54) | 2.23 (0.71, 7.01)  |
| Q5                     | ref.                  | ref.              | ref.              | ref.               |
| P interaction          | 0.41              |                   |                   | 0.15              |                   |                   | 0.17              |                   |                       | 0.62              |                   |                    |
| <b>Mesor</b>           |                   |                   |                   |                   |                   |                   |                   |                   |                       |                   |                   |                    |
| Q1                     | 1.69 (1.01, 2.83) | 0.85 (0.52, 1.41) | 1.28 (0.39, 4.2)  | 1.47 (0.82, 2.62) | 0.94 (0.58, 1.51) | 1.09 (0.34, 3.52) | 1.85 (0.73, 4.72) | 1.11 (0.66, 1.87) | 1.74 (0.22, 14.03)    | 1.58 (0.98, 2.55) | 0.93 (0.57, 1.54) | 0.66 (0.18, 2.37)  |
| Q2                     | 1.29 (0.79, 2.11) | 0.93 (0.45, 1.93) | 0.69 (0.23, 2.05) | 1.02 (0.54, 1.92) | 0.76 (0.35, 1.66) | 0.69 (0.23, 2.05) | 0.69 (0.25, 1.89) | 0.38 (0.1, 1.41)  | 2.8 (0.31, 25.01)     | 1.19 (0.71, 1.99) | 0.64 (0.33, 1.24) | 0.33 (0.09, 1.12)  |
| Q3                     | 2.02 (1.03, 3.93) | 0.85 (0.49, 1.46) | 1.24 (0.44, 3.5)  | 2.05 (1.07, 3.92) | 0.83 (0.4, 1.7)   | 0.82 (0.2, 3.33)  | 0.48 (0.18, 1.28) | 0.73 (0.29, 1.85) | 0 (0, 0)              | 1.73 (0.82, 3.63) | 0.6 (0.34, 1.06)  | 1.1 (0.32, 3.79)   |
| Q4                     | 1.48 (0.81, 2.72) | 0.76 (0.46, 1.24) | 0.95 (0.33, 2.71) | 1.49 (0.88, 2.55) | 1.05 (0.54, 2.03) | 0.6 (0.19, 1.93)  | 0.63 (0.24, 1.69) | 0.24 (0.08, 0.74) | 4.78 (0.49, 46.83)    | 1.29 (0.69, 2.4)  | 0.62 (0.31, 1.24) | 0.76 (0.25, 2.31)  |
| Q5                     | ref.                  | ref.              | ref.              | ref.               |
| P interaction          | 0.65              |                   |                   | 0.30              |                   |                   | 0.15              |                   |                       | 0.63              |                   |                    |
| <b>Amplitude:Mesor</b> |                   |                   |                   |                   |                   |                   |                   |                   |                       |                   |                   |                    |
| Q1                     | 1.45 (0.96, 2.19) | 0.97 (0.46, 2.03) | 2.26 (0.98, 5.22) | 1.63 (0.9, 2.96)  | 1.19 (0.53, 2.71) | 1.48 (0.53, 4.16) | 1.59 (0.51, 4.91) | 3.1 (0.98, 9.8)   | 0.83 (0.11, 6.15)     | 1.4 (0.82, 2.38)  | 2.19 (1.13, 4.24) | 1.71 (0.59, 5.01)  |
| Q2                     | 1.42 (0.91, 2.21) | 0.83 (0.44, 1.59) | 1.44 (0.73, 2.85) | 1.41 (0.75, 2.67) | 0.67 (0.33, 1.36) | 0.36 (0.13, 1.02) | 1.62 (0.6, 4.37)  | 2.23 (0.6, 8.35)  | 2.97 (0.18, 48.74)    | 0.9 (0.52, 1.56)  | 1.08 (0.56, 2.06) | 0.84 (0.24, 2.88)  |
| Q3                     | 0.94 (0.52, 1.7)  | 0.82 (0.42, 1.61) | 2.61 (1.35, 5.05) | 0.78 (0.37, 1.66) | 0.94 (0.44, 1.97) | 0.96 (0.38, 2.43) | 0.97 (0.36, 2.62) | 1.61 (0.3, 8.65)  | 5.41 (0.5, 58.6)      | 0.92 (0.56, 1.52) | 1.62 (0.88, 3.01) | 0.53 (0.17, 1.66)  |
| Q4                     | 1.31 (0.78, 2.22) | 0.71 (0.38, 1.35) | 1.03 (0.33, 3.21) | 1.16 (0.63, 2.14) | 0.8 (0.39, 1.65)  | 0.93 (0.4, 2.13)  | 1.45 (0.35, 5.96) | 1.56 (0.35, 6.91) | 0.52 (0.03, 9.03)     | 0.91 (0.55, 1.5)  | 1.29 (0.59, 2.78) | 0.47 (0.14, 1.61)  |
| Q5                     | ref.                  | ref.              | ref.              | ref.               |
| P interaction          | 0.91              |                   |                   | 0.24              |                   |                   | 0.17              |                   |                       | 0.72              |                   |                    |
| <b>Acrophase</b>       |                   |                   |                   |                   |                   |                   |                   |                   |                       |                   |                   |                    |
| Q1                     | ref.                  | ref.              | ref.              | ref.               |
| Q2                     | 1 (0.61, 1.63)    | 0.97 (0.49, 1.91) | 1.1 (0.52, 2.32)  | 0.77 (0.38, 1.56) | 1.19 (0.6, 2.37)  | 1.28 (0.43, 3.84) | 0.93 (0.36, 2.39) | 1.61 (0.62, 4.2)  | 0.6 (0.18, 2.05)      | 1.3 (0.78, 2.17)  | 0.7 (0.31, 1.57)  | 0.4 (0.16, 1.02)   |
| Q3                     | 1.01 (0.58, 1.75) | 0.87 (0.42, 1.8)  | 0.74 (0.24, 2.27) | 0.8 (0.49, 1.32)  | 1.22 (0.59, 2.51) | 0.81 (0.32, 2.11) | 0.48 (0.21, 1.11) | 1.14 (0.29, 4.42) | 0.14 (0.01, 3.7)      | 0.79 (0.41, 1.54) | 0.9 (0.47, 1.73)  | 1.43 (0.52, 3.94)  |
| Q4                     | 1.02 (0.64, 1.64) | 0.91 (0.41, 2.04) | 0.87 (0.27, 2.79) | 0.94 (0.58, 1.53) | 1.12 (0.54, 2.33) | 0.84 (0.32, 2.22) | 0.26 (0.11, 0.65) | 1.28 (0.53, 3.13) | 1.4 (0.22, 9)         | 0.95 (0.55, 1.65) | 0.66 (0.3, 1.45)  | 1.23 (0.47, 3.2)   |
| Q5                     | 1.06 (0.62, 1.82) | 0.81 (0.41, 1.6)  | 0.78 (0.25, 2.42) | 0.92 (0.53, 1.59) | 1.13 (0.54, 2.38) | 1.12 (0.3, 4.23)  | 1.04 (0.55, 1.97) | 0.93 (0.4, 2.15)  | 0.16 (0.01, 2.73)     | 1.18 (0.64, 2.16) | 0.92 (0.57, 1.49) | 2.66 (1.07, 6.62)  |
| P interaction          | 0.99              |                   |                   | 0.51              |                   |                   | 0.28              |                   |                       | 0.31              |                   |                    |
| <b>IS</b>              |                   |                   |                   |                   |                   |                   |                   |                   |                       |                   |                   |                    |
| Q1                     | 0.99 (0.54, 1.81) | 0.64 (0.32, 1.26) | 0.9 (0.37, 2.21)  | 1.5 (0.85, 2.63)  | 1.04 (0.59, 1.82) | 1.42 (0.55, 3.61) | 3.33 (1.25, 8.88) | 1.74 (0.82, 3.69) | 8.83 (0.42, 185.35)   | 1.92 (1.15, 3.22) | 1.48 (0.71, 3.11) | 1.03 (0.24, 4.42)  |
| Q2                     | 1.01 (0.55, 1.86) | 0.94 (0.51, 1.74) | 1.03 (0.39, 2.73) | 1.01 (0.59, 1.73) | 1.47 (0.81, 2.66) | 0.96 (0.43, 2.18) | 1.02 (0.34, 3.03) | 1.17 (0.47, 2.9)  | 1.29 (0.09, 18.38)    | 1.53 (0.87, 2.7)  | 0.97 (0.49, 1.89) | 2.43 (0.59, 10.05) |
| Q3                     | 0.8 (0.41, 1.54)  | 0.9 (0.44, 1.86)  | 0.76 (0.25, 2.28) | 1.12 (0.56, 2.22) | 0.75 (0.33, 1.7)  | 0.88 (0.34, 2.26) | 1.69 (0.63, 4.51) | 0.76 (0.27, 2.09) | 0.53 (0.01, 26.62)    | 1.32 (0.81, 2.14) | 0.84 (0.43, 1.61) | 1.19 (0.28, 5.13)  |
| Q4                     | 0.73 (0.37, 1.47) | 0.87 (0.44, 1.71) | 0.78 (0.38, 1.57) | 0.86 (0.5, 1.48)  | 0.79 (0.36, 1.74) | 0.69 (0.25, 1.86) | 1.45 (0.46, 4.61) | 0.6 (0.24, 1.5)   | 5.78 (0.42, 78.72)    | 1.14 (0.55, 2.39) | 0.83 (0.41, 1.67) | 1.06 (0.32, 3.44)  |
| Q5                     | ref.                  | ref.              | ref.              | ref.               |
| P interaction          | 0.95              |                   |                   | 0.55              |                   |                   | 0.20              |                   |                       | 0.65              |                   |                    |
| <b>IV</b>              |                   |                   |                   |                   |                   |                   |                   |                   |                       |                   |                   |                    |
| Q1                     | ref.                  | ref.              | ref.              | ref.               |
| Q2                     | 0.82 (0.37, 1.81) | 0.81 (0.46, 1.43) | 1.54 (0.67, 3.51) | 0.93 (0.44, 1.98) | 0.67 (0.39, 1.14) | 0.74 (0.24, 2.29) | 0.79 (0.29, 2.12) | 0.9 (0.25, 3.27)  | 0.05 (0, 0.64)        | 0.77 (0.44, 1.36) | 1.5 (0.86, 2.59)  | 0.57 (0.19, 1.67)  |
| Q3                     | 1.18 (0.56, 2.49) | 0.99 (0.55, 1.8)  | 1.65 (0.65, 4.22) | 1.05 (0.52, 2.12) | 0.87 (0.48, 1.55) | 1.31 (0.52, 3.29) | 0.98 (0.49, 1.99) | 1.06 (0.23, 4.85) | 1.12 (0.08, 15.67)    | 0.94 (0.6, 1.49)  | 1.18 (0.69, 2.01) | 0.87 (0.26, 2.92)  |
| Q4                     | 1.33 (0.61, 2.93) | 0.99 (0.51, 1.91) | 1.86 (0.86, 4.01) | 0.89 (0.44, 1.8)  | 0.76 (0.41, 1.41) | 1.53 (0.67, 3.51) | 0.66 (0.25, 1.76) | 0.83 (0.24, 2.86) | 0.27 (0.03, 2.53)     | 0.97 (0.53, 1.77) | 1.65 (0.98, 2.79) | 1.16 (0.47, 2.85)  |

|                          |                   |                   |                  |                   |                   |                   |                   |                  |                  |                   |                   |                  |
|--------------------------|-------------------|-------------------|------------------|-------------------|-------------------|-------------------|-------------------|------------------|------------------|-------------------|-------------------|------------------|
| Q5                       | 1.04 (0.55, 1.96) | 0.65 (0.36, 1.15) | 1.62 (0.7, 3.72) | 1.07 (0.57, 1.99) | 1.18 (0.63, 2.22) | 1.22 (0.56, 2.65) | 2.26 (0.89, 5.74) | 2.8 (1.45, 5.42) | 0.17 (0.01, 5.2) | 1.16 (0.64, 2.12) | 1.55 (0.86, 2.79) | 0.62 (0.13, 2.9) |
| P <sub>interaction</sub> | 0.59              |                   |                  | 0.62              |                   |                   | 0.09              |                  |                  | 0.58              |                   |                  |

Abnormal levels defined as >47 IU/L in men or >30 IU/L in women for ALT, >33 IU/L in men and women for AST, >113 IU/L in men and women for ALP and >65 IU/L in men or >36 IU/L in women for GGT

Model adjusted for age, gender, race and ethnicity, education, household income, marital status, smoking, alcohol, hepatitis B, hepatitis C and hepatitis E.

Abbreviations: NHANES, National Health and Nutrition Examination Survey; ALT, alanine aminotransferase; AST, aspartate aminotransferase; ALP, alkaline phosphatase; GGT, gamma glutamyl transaminase



**Table S10. Associations (OR and 95% CI) between impaired rhythmicity score and abnormal levels of liver enzymes, albumin, and bilirubin, stratified by diabetes status, NHANES 2011 – 2014**

| Impaired rhythmicity score | ALT               | AST               | ALP               | GGT               | Albumin           | Bilirubin         |
|----------------------------|-------------------|-------------------|-------------------|-------------------|-------------------|-------------------|
| 0                          | ref.              | ref.              | ref.              | ref.              | ref.              | ref.              |
| 1                          | 1.18 (0.79, 1.76) | 1.15 (0.81, 1.62) | 1.51 (0.75, 3.02) | 1.38 (0.99, 1.92) | 1.26 (0.66, 2.42) | 0.91 (0.46, 1.8)  |
| 2                          | 1.08 (0.72, 1.61) | 1.31 (0.88, 1.95) | 1.57 (0.79, 3.11) | 1.75 (1.21, 2.52) | 2.7 (1.57, 4.66)  | 1.35 (0.75, 2.43) |
| 3+                         | 1.22 (0.75, 2)    | 1.58 (0.88, 2.86) | 3.77 (2.17, 6.56) | 1.86 (1.19, 2.9)  | 4.65 (2.55, 8.46) | 1.35 (0.7, 2.61)  |
| P <sub>trend</sub>         | 0.31              | 0.08              | 0.001             | 0.002             | <0.001            | 0.21              |

Abnormal levels defined as >47 IU/L in men or >30 IU/L in women for ALT, >33 IU/L in men and women for AST, >113 IU/L in men and women for ALP and >65 IU/L in men or >36 IU/L in women for GGT

Model adjusted for age, gender, race and ethnicity, education, household income, marital status, smoking, alcohol, hepatitis B, hepatitis C and hepatitis E.

Abbreviations: NHANES, National Health and Nutrition Examination Survey; ALT, alanine aminotransferase; AST, aspartate aminotransferase; ALP, alkaline phosphatase; GGT, gamma glutamyl transaminase

**Table S11. Associations (OR and 95% CI) between rest-activity rhythm characteristics quintiles and abnormal liver enzyme score, NHANES 2011 – 2014**

|                               | Abnormal liver enzyme score |
|-------------------------------|-----------------------------|
| <b>F statistic</b>            |                             |
| Q1                            | 1.7 (1.34, 2.17)            |
| Q2                            | 1.46 (1.18, 1.8)            |
| Q3                            | 0.98 (0.79, 1.2)            |
| Q4                            | 0.88 (0.71, 1.09)           |
| Q5                            | ref.                        |
| P <sub>trend</sub>            | <0.001                      |
| <b>Amplitude</b>              |                             |
| Q1                            | 1.75 (1.28, 2.39)           |
| Q2                            | 1.3 (0.99, 1.71)            |
| Q3                            | 1.24 (0.98, 1.57)           |
| Q4                            | 1.15 (0.86, 1.54)           |
| Q5                            | ref.                        |
| P <sub>trend</sub>            | 0.72                        |
| <b>Mesor</b>                  |                             |
| Q1                            | 1.37 (1.07, 1.76)           |
| Q2                            | 0.97 (0.77, 1.21)           |
| Q3                            | 1.1 (0.86, 1.42)            |
| Q4                            | 0.99 (0.78, 1.27)           |
| Q5                            | ref.                        |
| P <sub>trend</sub>            | 0.78                        |
| <b>Amplitude:Mesor</b>        |                             |
| Q1                            | 1.73 (1.27, 2.37)           |
| Q2                            | 1.11 (0.86, 1.44)           |
| Q3                            | 1.1 (0.84, 1.45)            |
| Q4                            | 1.18 (0.89, 1.56)           |
| Q5                            | ref.                        |
| P <sub>trend</sub>            | 0.14                        |
| <b>Acrophase</b>              |                             |
| Q1                            | ref.                        |
| Q2                            | 0.97 (0.78, 1.22)           |
| Q3                            | 1.03 (0.8, 1.32)            |
| Q4                            | 0.98 (0.78, 1.24)           |
| Q5                            | 1.14 (0.89, 1.47)           |
| P <sub>trend</sub>            | 0.36                        |
| <b>Interdaily stability</b>   |                             |
| Q1                            | 1.59 (1.18, 2.13)           |
| Q2                            | 1.34 (0.97, 1.85)           |
| Q3                            | 1.11 (0.85, 1.46)           |
| Q4                            | 0.92 (0.72, 1.18)           |
| Q5                            | ref.                        |
| P <sub>trend</sub>            | <0.001                      |
| <b>Intradaily variability</b> |                             |
| Q1                            | ref.                        |
| Q2                            | 0.95 (0.75, 1.21)           |

|                    |                   |
|--------------------|-------------------|
| Q3                 | 1.09 (0.82, 1.45) |
| Q4                 | 1.5 (1.18, 1.92)  |
| Q5                 | 1.43 (1.16, 1.77) |
| P <sub>trend</sub> | <0.001            |

---

Abnormal liver enzyme score represents the number of abnormal levels of ALT, ASLP, AST, GGT, albumin, and bilirubin, range from 0 to 3+.

Results obtained by ordered logistic regression.

Model adjusted for age, gender, race and ethnicity, education, household income, marital status, smoking, alcohol, hepatitis B, hepatitis C and hepatitis E.

Abbreviations: NHANES, National Health and Nutrition Examination Survey; ALT, alanine aminotransferase; AST, aspartate aminotransferase; ALP, alkaline phosphatase; GGT, gamma glutamyl transaminase
